1 **A new paradigm for leprosy diagnosis based on host gene expression**

2 **Insights from leprosy lesions transcriptomics**

3 Thyago Leal-Calvo<sup>1</sup>, Charlotte Avanzi<sup>2,#a</sup>, Mayara Abud Mendes<sup>1</sup>, Andrej Benjak<sup>2,#b</sup>,  
4 Philippe Busso<sup>2</sup>, Roberta Olmo Pinheiro<sup>1</sup>, Euzenir Nunes Sarno<sup>1</sup>, Stewart T. Cole<sup>2,3</sup>,  
5 Milton O. Moraes<sup>1\*</sup>

6 **Affiliations**

7 <sup>1</sup> Laboratório de Hanseníase, Instituto Oswaldo Cruz, FIOCRUZ, Rio de Janeiro, Rio  
8 de Janeiro, Brazil

9 <sup>2</sup> Global Health Institute, École Polytechnique Fédérale de Lausanne, Lausanne,  
10 Switzerland

11 <sup>3</sup> Institut Pasteur, Paris, France

12 <sup>#a</sup>Current address: Department of Microbiology, Immunology and Pathology,  
13 Mycobacteria Research Laboratories, Colorado State University, Fort Collins,  
14 Colorado, United States of America

15 <sup>#b</sup>Current address: Department for BioMedical Research, Oncogenomics Laboratory,  
16 University of Bern, Bern, Switzerland

17 \* Corresponding author

18 E-mail: [milton.moraes@fiocruz.br](mailto:milton.moraes@fiocruz.br) (MOM)

19

20

21

## 22 **Abstract**

23 Transcriptional profiling is a powerful tool to investigate and detect human diseases.  
24 In this study, we used bulk RNA-sequencing (RNA-Seq) to compare the  
25 transcriptomes in skin lesions of leprosy patients or controls affected by other dermal  
26 conditions such as granuloma annulare, a confounder for paucibacillary leprosy. We  
27 identified five genes capable of accurately distinguishing multibacillary and  
28 paucibacillary leprosy from other skin conditions. Indoleamine 2,3-dioxygenase 1  
29 (*IDO1*) expression alone was highly discriminatory, followed by *TLR10*, *BLK*, *CD38*,  
30 and *SLAMF7*, whereas the *HS3ST2* and *CD40LG* mRNA separated multi- and  
31 paucibacillary leprosy. Finally, from the main differentially expressed genes (DEG) and  
32 enriched pathways, we conclude that paucibacillary disease is characterized by  
33 epithelioid transformation and granuloma formation, with an exacerbated cellular  
34 immune response, while multibacillary leprosy features epithelial-mesenchymal  
35 transition with phagocytic and lipid biogenesis patterns in the skin. These findings will  
36 help catalyze the development of better diagnostic tools and potential host-based  
37 therapeutic interventions. Finally, our data may help elucidate host-pathogen interplay  
38 driving disease clinical manifestations.

## 39 **Author Summary**

40 Despite effective treatment, leprosy is still a significant public health issue in  
41 more than 120 countries, with more than 200 000 new cases yearly. The disease is  
42 caused mainly by *Mycobacterium leprae*, a slow-growing bacillus still uncultivable in  
43 axenic media. This limitation has hampered basic research into host-pathogen

44 interaction and the development of new diagnostic assays. Currently, leprosy is  
45 diagnosed clinically, with no standalone diagnostic assay accurate enough for all  
46 clinical forms. Here, we use RNA-seq transcriptome profiling in leprosy lesions and  
47 granuloma annulare to identify mRNA biomarkers with potential diagnostic  
48 applications. Also, we explored new pathways that can be useful in further  
49 understanding the host-pathogen interaction and how the bacteria bypass host  
50 immune defenses. We found that *IDO1*, a gene involved with tryptophan catabolism,  
51 is an excellent candidate for distinguishing leprosy lesions from other dermatoses.  
52 Additionally, we observed that a previous signature of keratinocyte development and  
53 cornification negatively correlates with epithelial-mesenchymal transition genes in the  
54 skin, suggesting new ways in which the pathogen may subvert its host to survive and  
55 spread throughout the body. Our study identifies new mRNA biomarkers that can  
56 improve leprosy diagnostics and describe new insights about host-pathogen  
57 interactions in human skin.

## 58 Introduction

59           Leprosy is a chronic infectious disease caused mainly by the slow-growing  
60 intracellular pathogen *Mycobacterium leprae* that does not grow in axenic media. This  
61 bacterium resides preferentially in skin macrophages and Schwann cells in peripheral  
62 nerves, inducing dermatosis and/or neuritis. Patients can present several distinct  
63 clinical forms according to their immune response, histopathological characterization,  
64 and bacterial load. A localized tuberculoid form (TT) is characterized by low bacterial  
65 counts and a strong cellular immune response. Conversely, in the opposite  
66 lepromatous (LL) pole, a disseminated form, patients exhibit several lesions, a  
67 predominantly humoral response, and a high bacterial load in the tissues [1–3].  
68 Borderline forms are classified according to their proximity to the poles. For operational  
69 and treatment purposes, leprosy is classified by the World Health Organization as  
70 paucibacillary (PB) or multibacillary (MB), based on the number of skin lesions,  
71 associated with nerve involvement or the bacilli detection in slit-skin smears [4].

72           Early and precise diagnosis is instrumental to leprosy control since delay in  
73 diagnosis leads to late multidrug therapy, higher disability risk, and continuing  
74 transmission, as highlighted by the 200,000 new cases consistently reported annually  
75 in the last 10 years [4,5]. However, bacteriological, immunological, genetics or  
76 molecular methods are not sufficient for specific diagnosis when used alone.  
77 Diagnosis most commonly relies on clinical evaluation, occasionally complemented  
78 with histopathological examination and bacterial counts, but these procedures are  
79 mostly performed in national reference centers [4,6].

80           Efforts have been deployed to improve leprosy diagnostics using cutting-edge  
81 technologies, such as molecular identification of *M. leprae*, serological tests for  
82 specific bacterial antigens, and quantification of host biomarkers in plasma or *in vitro*  
83 whole blood assays (WBA) [7–9]. Overall, all methods outperform standard clinical  
84 diagnosis and can compensate for the low accuracy in detecting PB patients  
85 [4,7,8,10–14]. Yet, until now such investigations involved comparing confirmed leprosy  
86 cases against healthy endemic controls, who are not representative of individuals with  
87 suspected leprosy. Here, other skin conditions represent a better comparator.

88           Identification of markers for early infection is hindered by our poor  
89 understanding of pathogenicity and the mechanism by which patients develop one or  
90 the other form of leprosy, and nerve injuries [15]. Gene expression signatures have  
91 been used as diagnostic tools for several illnesses, from infectious [10–12,14] and  
92 autoimmune diseases [16,17] to cancer [18–20]. Some signatures have already been  
93 approved for clinical use [12,21–23]. In leprosy, findings from past studies indicate the  
94 great potential of expression profiling for disease diagnosis [24–27]. Nonetheless, they  
95 were limited by the number of patients [28], or lacked proper epidemiological controls,  
96 such as differential diagnosis groups.

97           Here, we applied a combination of bulk RNA sequencing and quantitative  
98 validation by RT-qPCR on RNA extracted from skin biopsies of various leprosy forms  
99 and from non-leprosy patients to define a specific leprosy host signature applicable to  
100 diagnosis. Then, we explored gene expression patterns to improve our understanding  
101 of the immunopathogenic mechanisms towards leprosy polarization.

## 102 **Results**

### 103 **Discrimination of leprosy vs. non-leprosy lesions based on** 104 **mRNA expression**

105 RNA sequencing was used for pinpointing host candidate genes capable of  
106 differentiating leprosy lesions from one of the commonest differential diagnoses of  
107 leprosy, granuloma annulare (GA), and from healthy skin. RNA from skin lesions of all  
108 leprosy clinical forms (n=33), plus GA (n=4) and healthy skin (n=5) were sequenced  
109 (S1 Table). Differentially expressed genes (DEG) in leprosy vs. non-leprosy (GA +  
110 healthy skin) samples resulted in 1160 DEG with a  $|\log_2FC| \geq 1$  and  $FDR \leq 0.01$ , with  
111 961 upregulated in leprosy forms compared to non-leprosy (Fig 1A-B and S2 Table).  
112 Exploratory hierarchical clustering of the DEG with  $|\log_2FC| \geq 1$  and  $FDR < 0.01$   
113 grouped all patients' samples into roughly two clusters, except for two: one BL leprosy  
114 and one GA that clustered apart from samples with the same diagnosis (Fig 1C). Gene  
115 Ontology enrichment analysis of up-regulated genes in leprosy compared to non-  
116 leprosy showed enrichment for biological processes associated with leukocyte  
117 activation, T-cell activation, immune response, response to the bacterium, neutrophil  
118 degranulation, cell killing, cytokine secretion, purinergic receptor signaling pathway,  
119 and regulation of defense response to viruses by the host (Fig 1D and S3 Table).

120

121

122

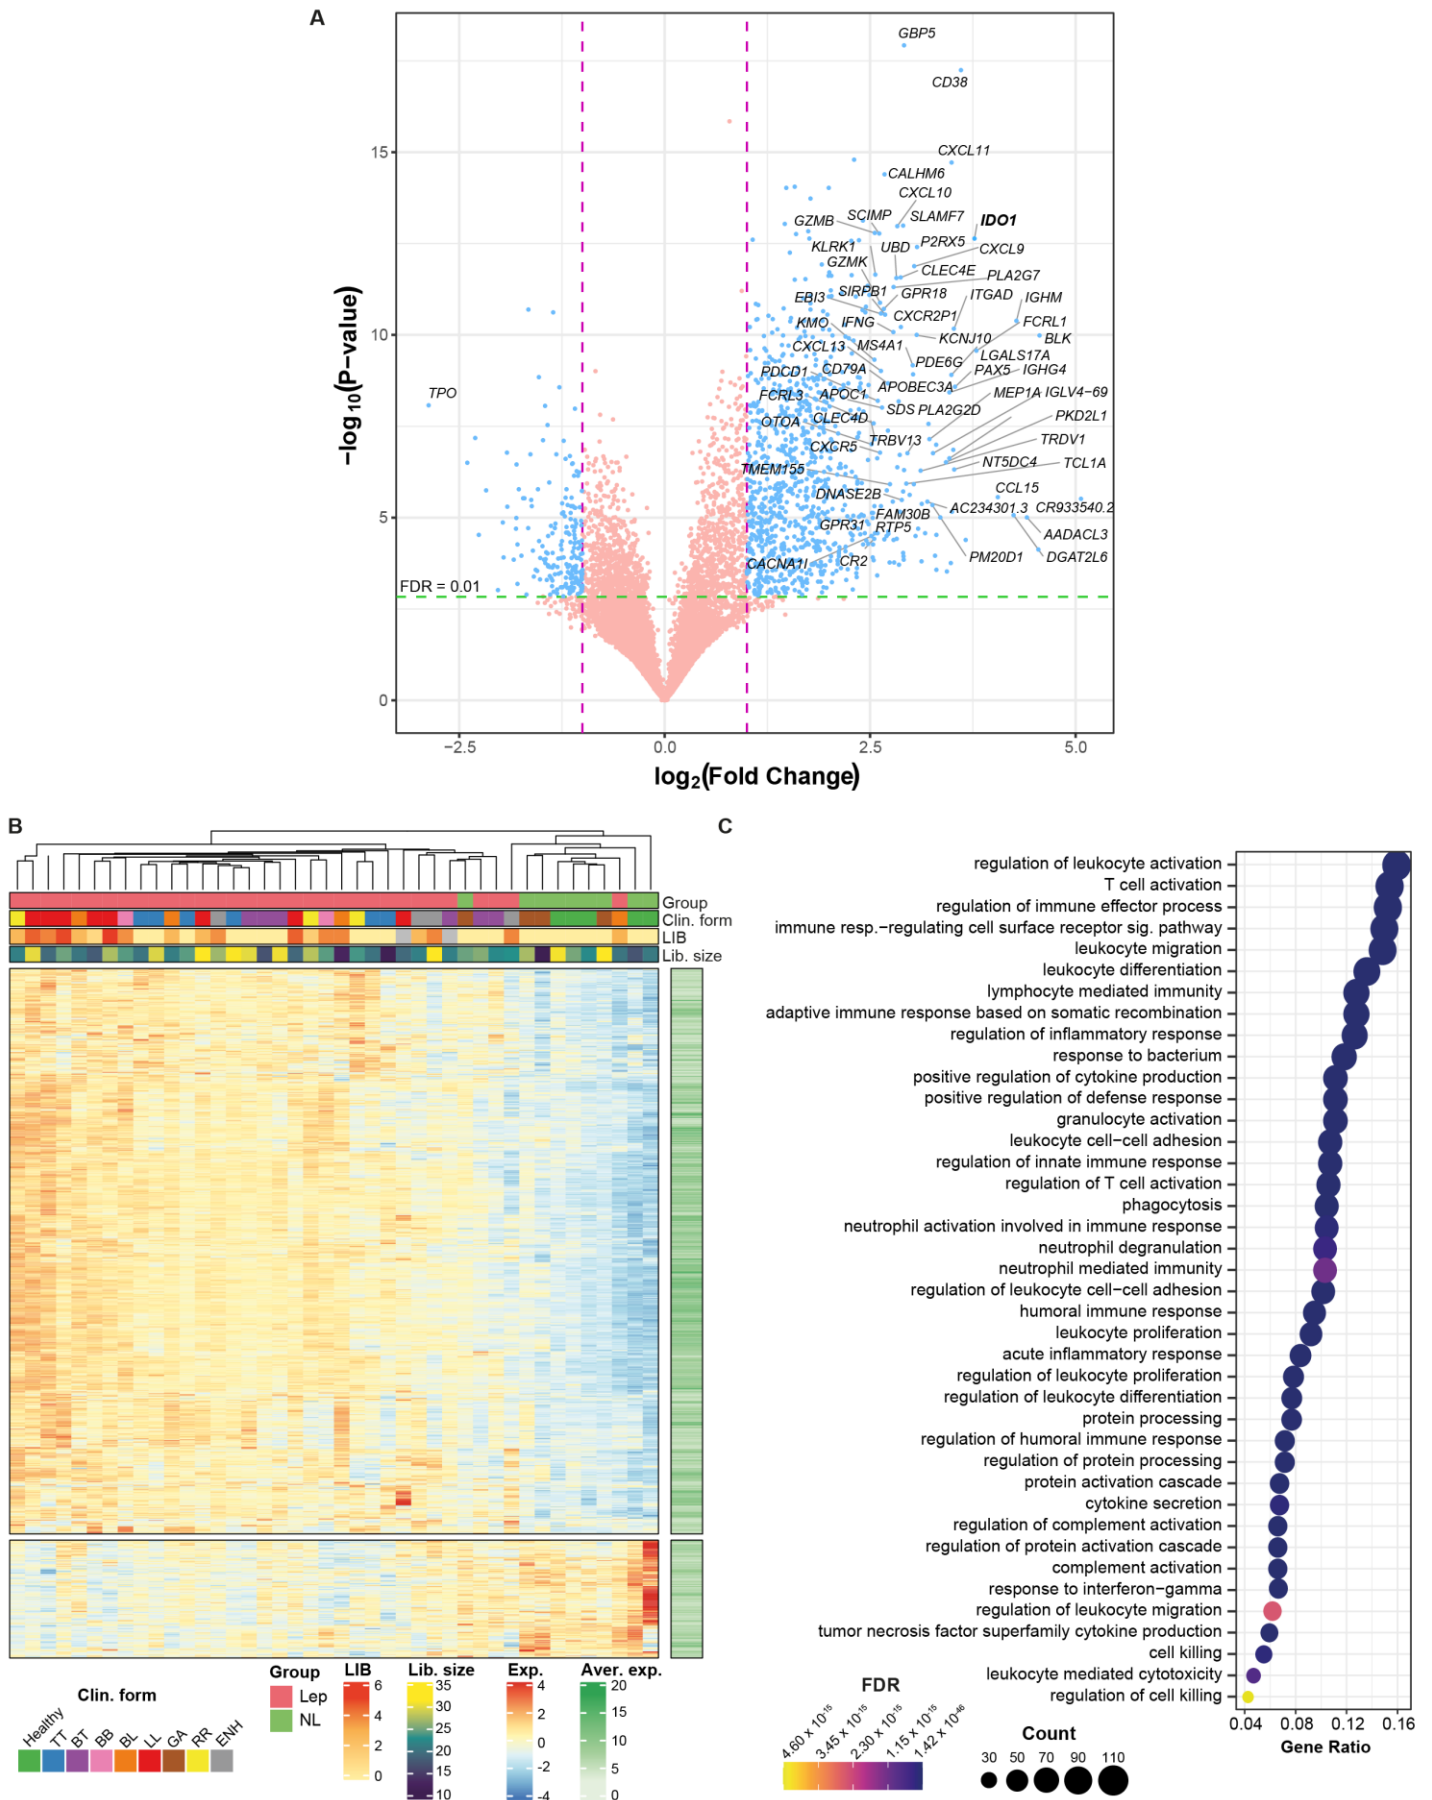

123 Fig 1. Differentially expressed genes from RNA-seq in leprosy vs. GA and

124 **leprosy vs. non-leprosy.** (A) Volcano plot depicting DEG from leprosy vs. non-  
125 leprosy, where violet dashed line marks  $|\log_2FC| = 1$ . For clarity, gene symbols are  
126 shown only for the largest  $\log_2FC$ . (B) Heatmap with hierarchical clustering of samples  
127 based on expression of the DEG from leprosy vs. non-leprosy comparison. Color scale  
128 ranges from lower expression (blue) to higher expression (red). Library size is given  
129 in millions. LIB, logarithmic index of bacilli. (C) Biological processes from GO enriched  
130 for up-regulated DEG from leprosy vs. non-leprosy comparison. FDR, false discovery  
131 rate; NL, non-leprosy; GA, granuloma annulare; non-leprosy: GA + healthy individuals.

132

133 A total of 15 genes with the largest effect size ( $|\log_2FC| \geq 1.5$ ,  $FDR < 0.001$ ),  
134 highest area under the curve (AUC), and plausible involvement with leprosy  
135 pathogenesis (S4 Table) were then validated using a two-step RT-qPCR with a new,  
136 larger, and more heterogeneous dataset including skin lesion samples from leprosy  
137 patients (n=25), and other common dermatoses (n=23) (S1 Table). Other  
138 dermatological diseases (ODD) included dermatitis (n=7), eczema (n=1), erythema  
139 (n=4), GA (n=6), lichen planus (n=2), psoriasis (n=2) and pityriasis alba (n=1) (S1  
140 Table). A total of 12 samples per group was estimated to be sufficient to attain a power  
141 of 85% based on the Welch t-test (PB vs. ODD, MB vs. ODD) with alpha set at 0.03  
142 to replicate the standardized effect size ( $\log_2FC/SD$ ) estimated from RNA sequencing.  
143 Relative expression using the new sample set by RT-qPCR is shown in Fig 2A. Indeed,  
144 the validation data are in agreement with RNA sequencing, because 11 tested genes  
145 were replicated by RT-qPCR in terms of difference between mean expression (effect  
146 size in  $\log_2FC$ ), except for *STAP1*, *GBP3*, *APOL3* and *CCR7* in PB vs. ODD  
147 comparison and *CCR7* in MB vs. ODD (Fig 2B-C, S5 Table). As for differentiating



148 leprosy *per se* vs. ODD, genes *IDO1*, *BLK* (exon 11), *CD38*, *CXCL11*, and *SLAMF7*,  
 149 all had an area under the curve (AUC) of at least 96% with their lower bound 97%  
 150 confidence intervals above 90% (Fig 2A, Fig 3C, S6 Table).

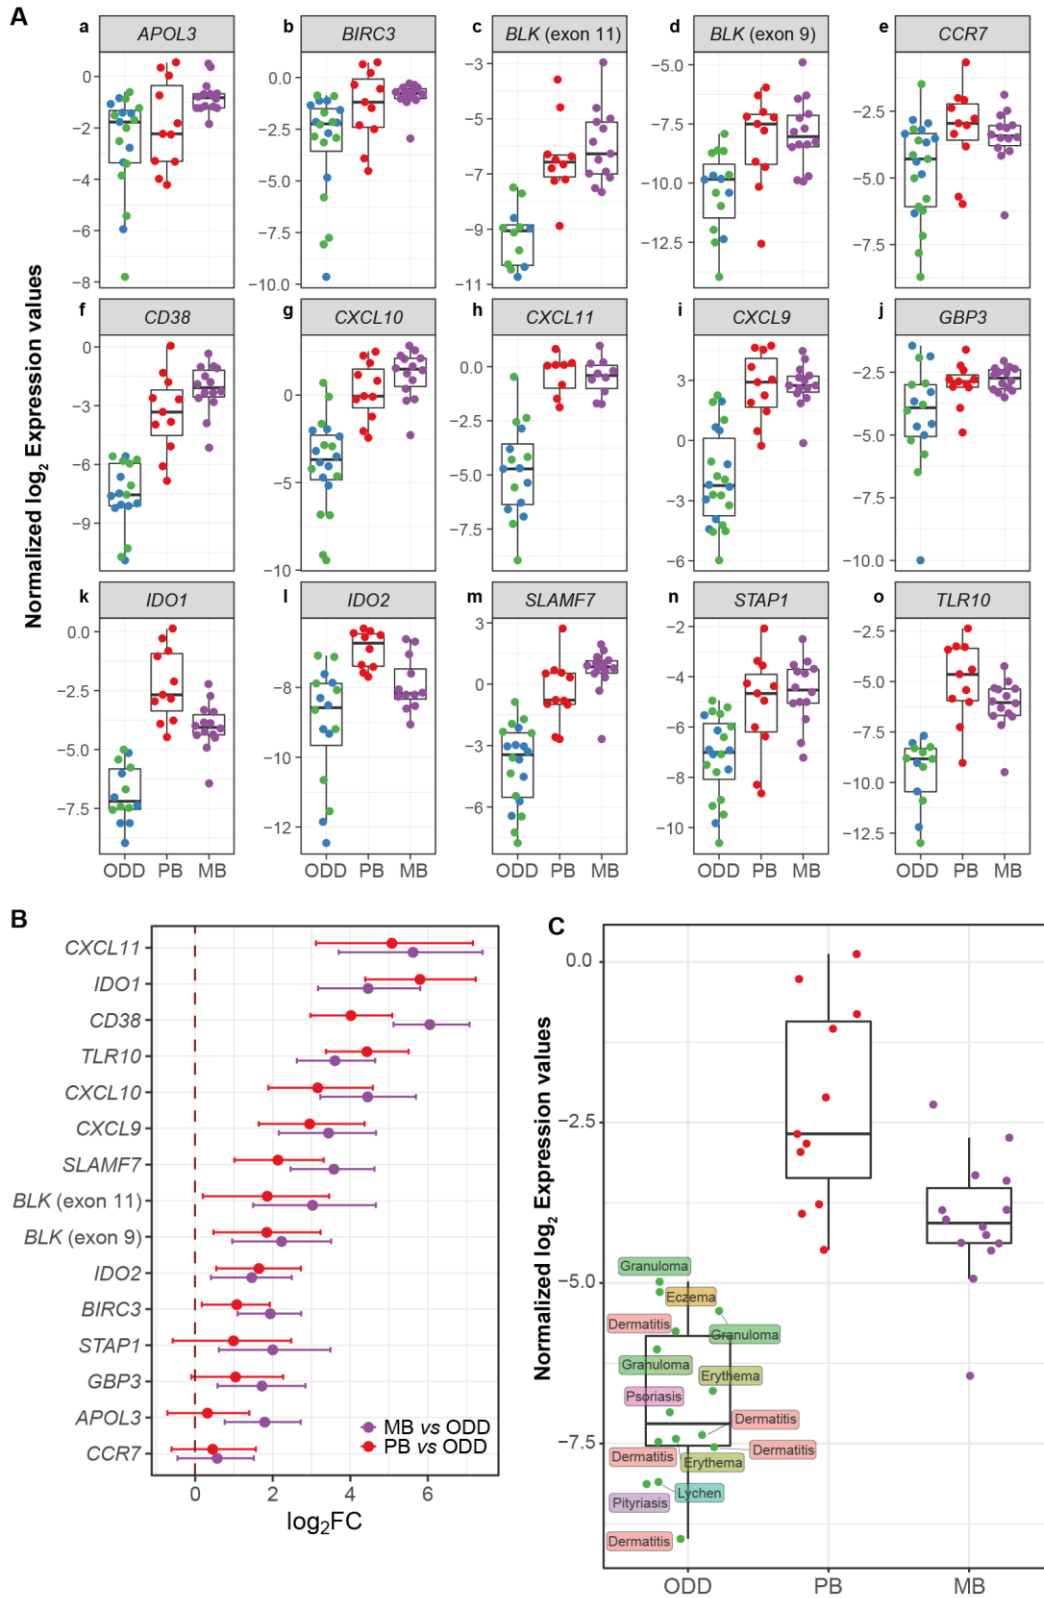

151 **Fig 2. Technical and biological validation for selected DEG discovered from RNA**  
152 **sequencing.** (A) Tukey boxplots with RT-qPCR normalized (2-3 reference genes)  $\log_2$   
153 expression values (A.U) according to clinical and histopathological diagnosis. ODD  
154 samples are colored according to *M. leprae* 16S rRNA qPCR status as positive (blue)  
155 or negative (green). (B)  $\log_2$ FC from MB-ODD and PB-ODD comparisons estimated  
156 from Bayesian linear mixed models and their 95% credible intervals. (C) Tukey boxplot  
157 highlighting *IDO1* RT-qPCR normalized  $\log_2$  expression values by final diagnosis  
158 grouped into ODD category. Missing values are omitted.

159

160 Next, hierarchical clustering with RT-qPCR data including missing values for  
161 some genes (no target gene amplification by RT-qPCR) was performed to examine all  
162 samples simultaneously. The analysis roughly revealed three major clusters (Fig 3A).  
163 At the highest tree subdivision, one small cluster (n=6) with the dendrogram grouped  
164 in light brown was composed of ODD samples with lower expression levels (Fig 3A).  
165 Due to several ODD having missing values, we confirmed that these samples had  
166 similar gene expression for the reference genes, thereby eliminating the possibility of  
167 insufficient cDNA input. Another cluster, grouped in the light purple dendrogram,  
168 included all MB and most PB samples (except four in light yellow dendrogram). GA  
169 samples displayed two patterns, the first with two samples showing undetectable *IDO1*  
170 expression (Fig 3A, bottom star symbols). The second set (n=4) is scattered among  
171 other ODD samples (Fig 3A). It can be seen that GA and PB samples show highly  
172 similar expression profiles for some genes (Fig 3A bottom diamond symbols),  
173 reinforcing the difficulty in clinically discriminating between these two conditions, and  
174 underlining the relevance of their inclusion in our comparisons [29–31].

175           Then, by applying principal component analysis (PCA) to the 15 gene signature  
176 obtained with the expanded sample panel tested by RT-qPCR, we uncovered two  
177 major patterns separating leprosy lesions from ODD (Fig 3B). As expected, MB  
178 samples appeared more homogeneous than PB and ODD samples, while the latter  
179 were more dispersed revealing heterogeneous expression patterns (Fig 3B).

180           Next, we quantified the individual classification potential of these genes in  
181 distinguishing leprosy from ODD using ROC analysis on RT-qPCR data. *IDO1*  
182 expression alone was found to be 98% accurate using an arbitrary threshold, followed  
183 by *BLK* (exon 11), *CD38*, *CXCL11*, and *SLAMF7* (Fig 3C and S6 Table). Finally, to  
184 confirm the causal link between mycobacteria and our gene-set, we evaluated the  
185 mRNA profiles induced by other live-mycobacteria using a public RNA-seq dataset  
186 [32]. We observed that most gene expression signatures, including *IDO1*, could be  
187 successfully replicated as induced by either *M. leprae* and/or other mycobacteria (Fig  
188 1 in Appendix S1 and S7 Table). By contrast, some of the tested genes such as *BLK*,  
189 *CXCL9*, *MS4A1*, and *TLR10* were not differentially expressed in any of the *in vitro*  
190 assays with mycobacteria (Fig 1 in Appendix S1 and S7 Table).

191

192

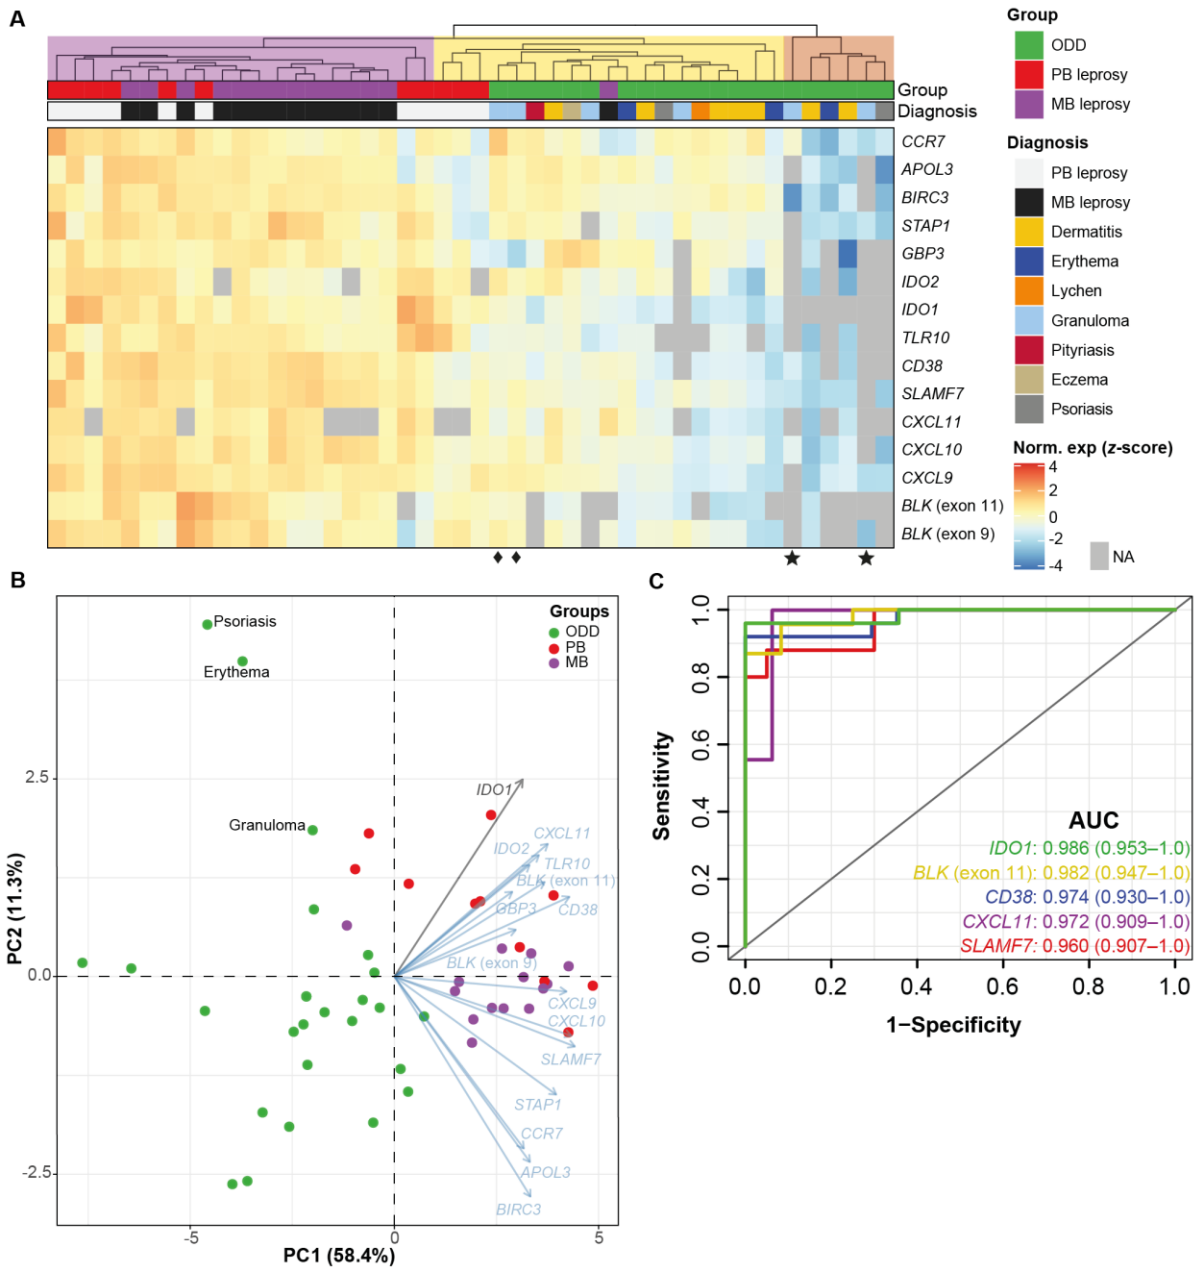

193 **Fig 3. Hierarchical clustering of RT-qPCR replicated DEG and ROC analysis. (A)**

194 Hierarchical clustering with scaled and centered normalized  $\log_2$  RT-qPCR expression

195 values (arbitrary units) and annotated according to group and specific diagnosis.

196 Dendrogram tree was cut arbitrarily and cluster analysis is for hypothesis generating

197 purposes only. Two samples had more than 13 missing expression values and were

198 removed from A. (B) Principal component analysis (PCA) with 15 genes measured by

199 RT-qPCR and using  $\log_2$  normalized scaled data. For PCA only, missing values were

200 imputed by the gene arithmetic mean. NA, not amplified, i.e., Cp > 40. In this regard,  
201 there were two outliers (psoriasis and erythema), which are samples with high  
202 numbers of NA values and that were imputed using the gene arithmetic mean. (C)  
203 Receiver operating characteristic analysis for genes with largest AUC (97%  
204 confidence intervals) from RT-qPCR replication samples (complete data are shown in  
205 S6 Table). See also S1 Appendix and S1 Fig.

## 206 **MB and PB gene expression profiling and mRNA-based** 207 **classifier**

208 To define a small subset of genes with high classificatory potential (i.e. with  
209 non-overlapping expression values) to distinguish MB from PB lesions, we performed  
210 a penalized logistic regression (LASSO) model with k-fold cross-validation trained on  
211 the public microarray dataset [24]. This dataset was chosen because of the higher  
212 number of PB/MB samples compared to our RNA-seq dataset. As a result, three genes  
213 with non-zero coefficients were selected by the cross-validated LASSO model:  
214 *HS3ST2*, *CD40LG*, and *CCR6*, but only the first two genes were most frequently  
215 (~80%) selected across 10,000 bootstrapped samples within the training dataset (Fig  
216 4A-B). The median misclassification error estimated by the resampling was about 4%  
217 ( $\pm 5.4\%$  median absolute deviation), ranging from 0% to 32% (Fig 4C). Instability  
218 assessment in the number of selected genes by LASSO (Fig 4D) showed that most  
219 iterations resulted in four non-zero genes (range, 1-20). The final model containing the  
220 three genes (*HS3ST2*, *CD40LG*, and *CCR6*) was evaluated on two test RNA-seq  
221 datasets: our dataset and the one from Montoya *et al.* including MB (n=9) and PB  
222 (n=6) groups [28]. Penalized logistic regression demonstrated an accuracy of 100%

223 (lower 95% CIs: 86.8% and 78.2%, respectively) in classifying MB from PB samples  
224 in both test RNA-seq datasets; yet, the Brier score indicated a better performance in  
225 Montoya's et al. dataset, probably due to a more homogenous sampling (Fig 4E-F).  
226 The *HS3ST2* gene was consistently more expressed in MB leprosy lesions compared  
227 to PB, whereas the opposite was observed for *CD40LG* (Fig 4E-H) and *CCR6* (S2  
228 Fig). In both datasets, the combined expression levels of *HS3ST2* and *CD40LG*  
229 showed good discrimination between the two groups (Fig 4E-H). However, given the  
230 sample size and the bootstrapped estimates, it is not currently possible to exclude  
231 *CCR6* from the model without additional replication.

232

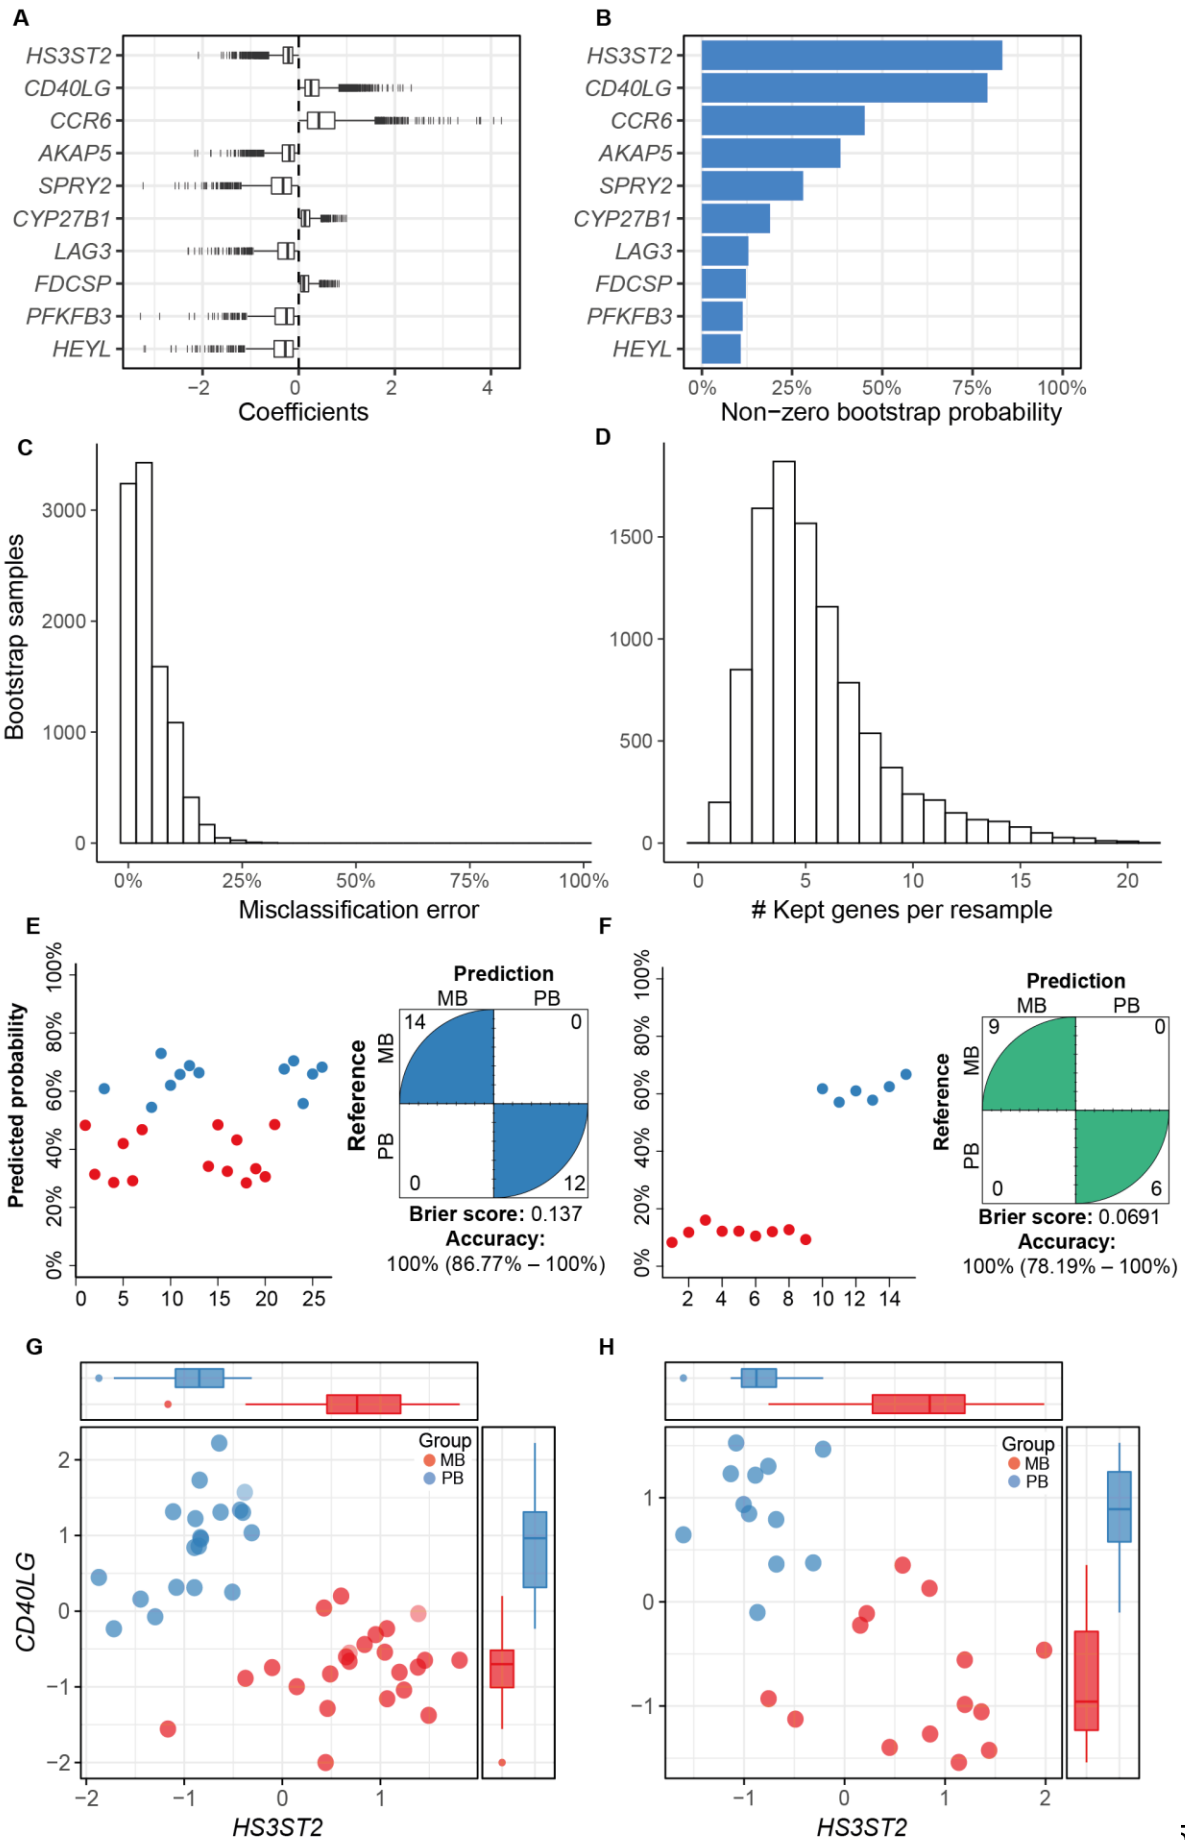

233 **Fig 4. Gene candidates identified with the penalized logistic regression (LASSO)**  
234 **model as the most important to distinguish PB and MB leprosy lesions. (A)**  
235 Coefficients (log odds) from the top 10 most selected genes (i.e., non-zero) across  
236 10,000 bootstrap samples using the microarray from Belone *et al.* as training dataset.  
237 (B) Frequency of non-zero coefficients across all bootstrap samples. (C)  
238 Misclassification error distribution estimated from 4-fold cross-validation (k-) across  
239 10,000 bootstrap samples, with median error of 3.70% ( $\pm 5.4\%$  median absolute  
240 deviation). (D) Number of genes kept across all resamples. Predicted probability from  
241 the final model performance on this study test RNA-seq (E) and Montoya *et al.* RNA-  
242 seq (F). Normalized  $\log_2$  gene expression (z-score) of the two most frequently selected  
243 variables for distinguishing MB from PB samples in the (G) microarray training dataset  
244 and (H) this study test RNA-seq. PB, paucibacillary leprosy; MB, multibacillary leprosy.  
245 Tukey box plots with 1st, 2nd and 3rd quartiles  $\pm 1.5 \times$  inter quartile range (IQR)  
246 whiskers. See also S2 Fig.

247

248 Next, to assess the dichotomy beyond cellular vs. humoral response in leprosy  
249 lesions [33,34], a comparison of gene expression in MB leprosy (LL+BL+BB) vs. PB  
250 (TT+BT) skin lesions was performed. Differential expression analysis with  $|\log_2FC| \geq$   
251 1 and  $FDR \leq 0.01$  resulted in 112 DEGs; 69 up-regulated and 43 down-regulated (Fig  
252 5A and S8 Table). In addition, we compared DEG to the public microarray data  
253 available in Gene Expression Omnibus (GEO) from Belone *et al.* [24,35] using only  
254 the FDR cutoff. With an  $FDR < 0.01$ , 161 DEGs were common to both studies, all  
255 except one showed concordant modulation characterized by an overall high  
256 correlation coefficient and concordance index, irrespective of the technology used, the



257 sample processing, and the data analysis methods (Fig 5B). Functional enrichment  
258 analysis of the RNA-seq up-regulated genes (i.e., more expressed in MB than PB)  
259 revealed processes involved with regulation of immune response, humoral immunity,  
260 phagocytosis, cholesterol metabolism, complement activation among others (Fig 5C  
261 and S9 Table). On the contrary, enrichment analysis of genes more expressed in PB  
262 revealed biological processes such as leukocyte differentiation, lymphocyte  
263 differentiation, lymphocyte-mediated immunity, B cell activation, STAT cascade  
264 activation/regulation, and JAK-STAT cascade activation (Fig 5D and S10 Table),  
265 which are consistent with exacerbated responses in granulomatous diseases.  
266 Localized clinical forms, i.e., BT and TT, show a gene expression pattern indicative of  
267 differentiation towards epithelioid transformation and granuloma assembly, which is  
268 also observed in cutaneous or pulmonary sarcoidosis [36,37].

269

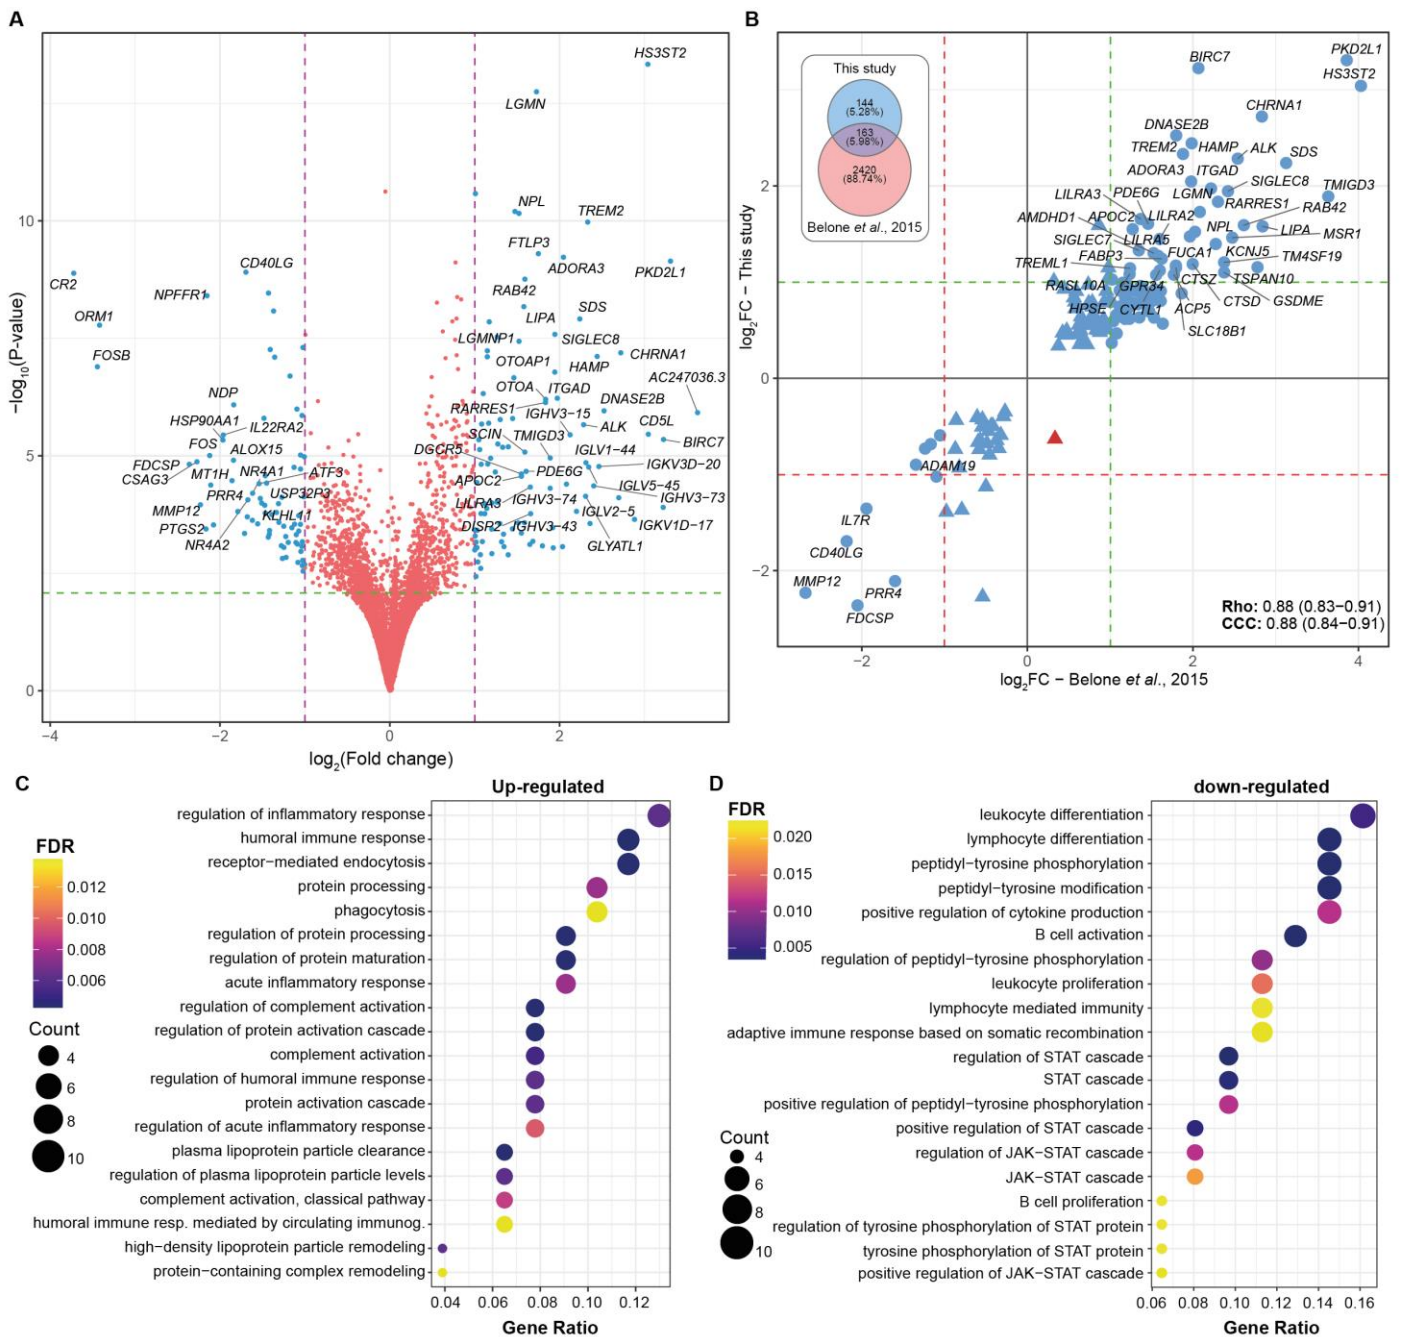

270 **Fig 5. Differentially expressed genes from multibacillary (MB) vs. paucibacillary**  
 271 **(PB) leprosy lesions.** (A) Volcano plot showing DEG from the MB vs. PB comparison,  
 272 where blue points are DE with  $|\log_2FC| \geq 1$  and  $FDR < 0.1$ . (B) Scatter plots with the  
 273 161 DEG common between this study and Belone *et al.* (24) microarray for the same  
 274 comparison. Red and green dashed lines indicate  $\log_2FC$  of -1 and 1, respectively.  
 275 Blue points are genes with the same modulation signal and red indicates discordancy.  
 276 Rho, Spearman's rank correlation coefficient. CCC, Lin's concordance correlation

277 coefficient. Venn diagram on the right displays the number of DEG in each study  
278 according to  $FDR < 0.01$ . (C) Biological processes from GO enriched from up-  
279 regulated and (D) down-regulated DEG. FDR, false discovery rate.

280

## 281 **Epithelial-mesenchymal transition (EMT) in the skin of** 282 **multibacillary leprosy patients**

283 To make the most of our dataset, we sought to test a previous hypothesis  
284 generated from our group's microarray meta-analysis results, in which we have  
285 identified a consistent down-regulation of cornification, keratinocyte differentiation,  
286 and epidermal development-related genes in leprosy lesions, predominantly in MB  
287 [35]. We first hypothesized that such regulation could result from *M. leprae* inducing  
288 dedifferentiation of keratinocytes, similar to the phenomenon described previously in  
289 infected Schwann cells [38], and also seen in skin cancer by a process known as  
290 epithelial-mesenchymal transition (EMT) [39,40]. To test the hypothesis that such  
291 modulation was involved with EMT, we correlated the expression of the previously  
292 identified down-regulated genes in leprosy [35] with a collection of genes involved with  
293 previously Schwann cell dedifferentiation by *M. leprae* (Masaki *et al.* [38] signatures  
294 for EMT and non-EMT genes), positive markers of EMT (from literature), as well as  
295 annotated EMT and mesenchymal-related genes from Reactome (R.HSA.452723,  
296 R.HSA.5619507.3, R.HSA.2173791) and Gene Ontology (GO0001837) databases.  
297 Briefly, the normalized  $\log_2$  expression matrices were filtered to retain only genes of  
298 interest. Then, the pairwise expression correlation for all genes was calculated using  
299 the Spearman's rank correlation procedure. Finally, after adjusting the P-values for

300 multiple testing, the genes with any pairwise correlation passing  $FDR \leq 1 \times 10^{-4}$  and  
301  $\rho \leq -0.8$  were visualized using a heat plot. As result, with this study's RNA-seq, we  
302 found a consistent moderate negative correlation between keratinization, cornification,  
303 and epidermal development genes (Fig 6A, blue stars, *AQP3*, *DMKN*, *DSG1*, *DSP*,  
304 *EFNB2*, *JAG1*, *JAG2*, *KRT5*, *KRT10*, *KRT15*, *KRT19*, *OVOL2*, *PKP1*, *TACSTD2*) with  
305 those involved with canonical/alternative EMT and mesenchymal phenotypes (Fig 6A,  
306 green stars, *CTSZ*, *MMP9*, *PSAP*, *RHOA*, *TGFBR1*, *TGIF2*, *ZEB2*, *TGFB1*).  
307 Interestingly, the strongest correlations with epidermal/keratinocyte genes was with  
308 TGF $\beta$ -EMT-related genes (Fig. 6A blue block), as opposed to Masaki et al. non-EMT  
309 and other mesenchymal/pluripotency pathways. Next, we replicated these  
310 observations with Belone *et al.* microarray [24] and Montoya *et al.* RNA-seq datasets  
311 [28], respectively. In Fig 6BC the strongest and representative correlations from  
312 TGF $\beta$ -EMT-related pathway and a keratinocyte/epidermal gene signature are shown  
313 in detail, while the remaining are available in Fig. S3-4.

314 Overall, these results showed a decreased expression pattern of EMT-related  
315 genes in healthy skin samples, and a linear expression increase in PB and MB  
316 patients, especially with the microarray dataset, except for *MMP9* (Fig 6C). This was  
317 accompanied by the previously reduced expression of cytokeratins and epidermal  
318 development genes observed in leprosy. From these results, we hypothesize that in  
319 addition to TGF $\beta$ -dependent immunosuppression in MB patients, activation of this  
320 pathway could be slowing or arresting keratinocyte cornification processes in leprosy  
321 lesions thereby both facilitating survival and/or spread of *M. leprae*. If not involved with  
322 dedifferentiation of keratinocytes or other epithelial cells, an alternative explanation  
323 would be loss of epithelial barrier in MB patients, possibly enlightening a new *M. leprae*

324 transmission route. Further mechanistic experiments ought to determine the causality  
325 of our observations and test these findings in light of our hypothetical explanations of  
326 the phenomenon.

327

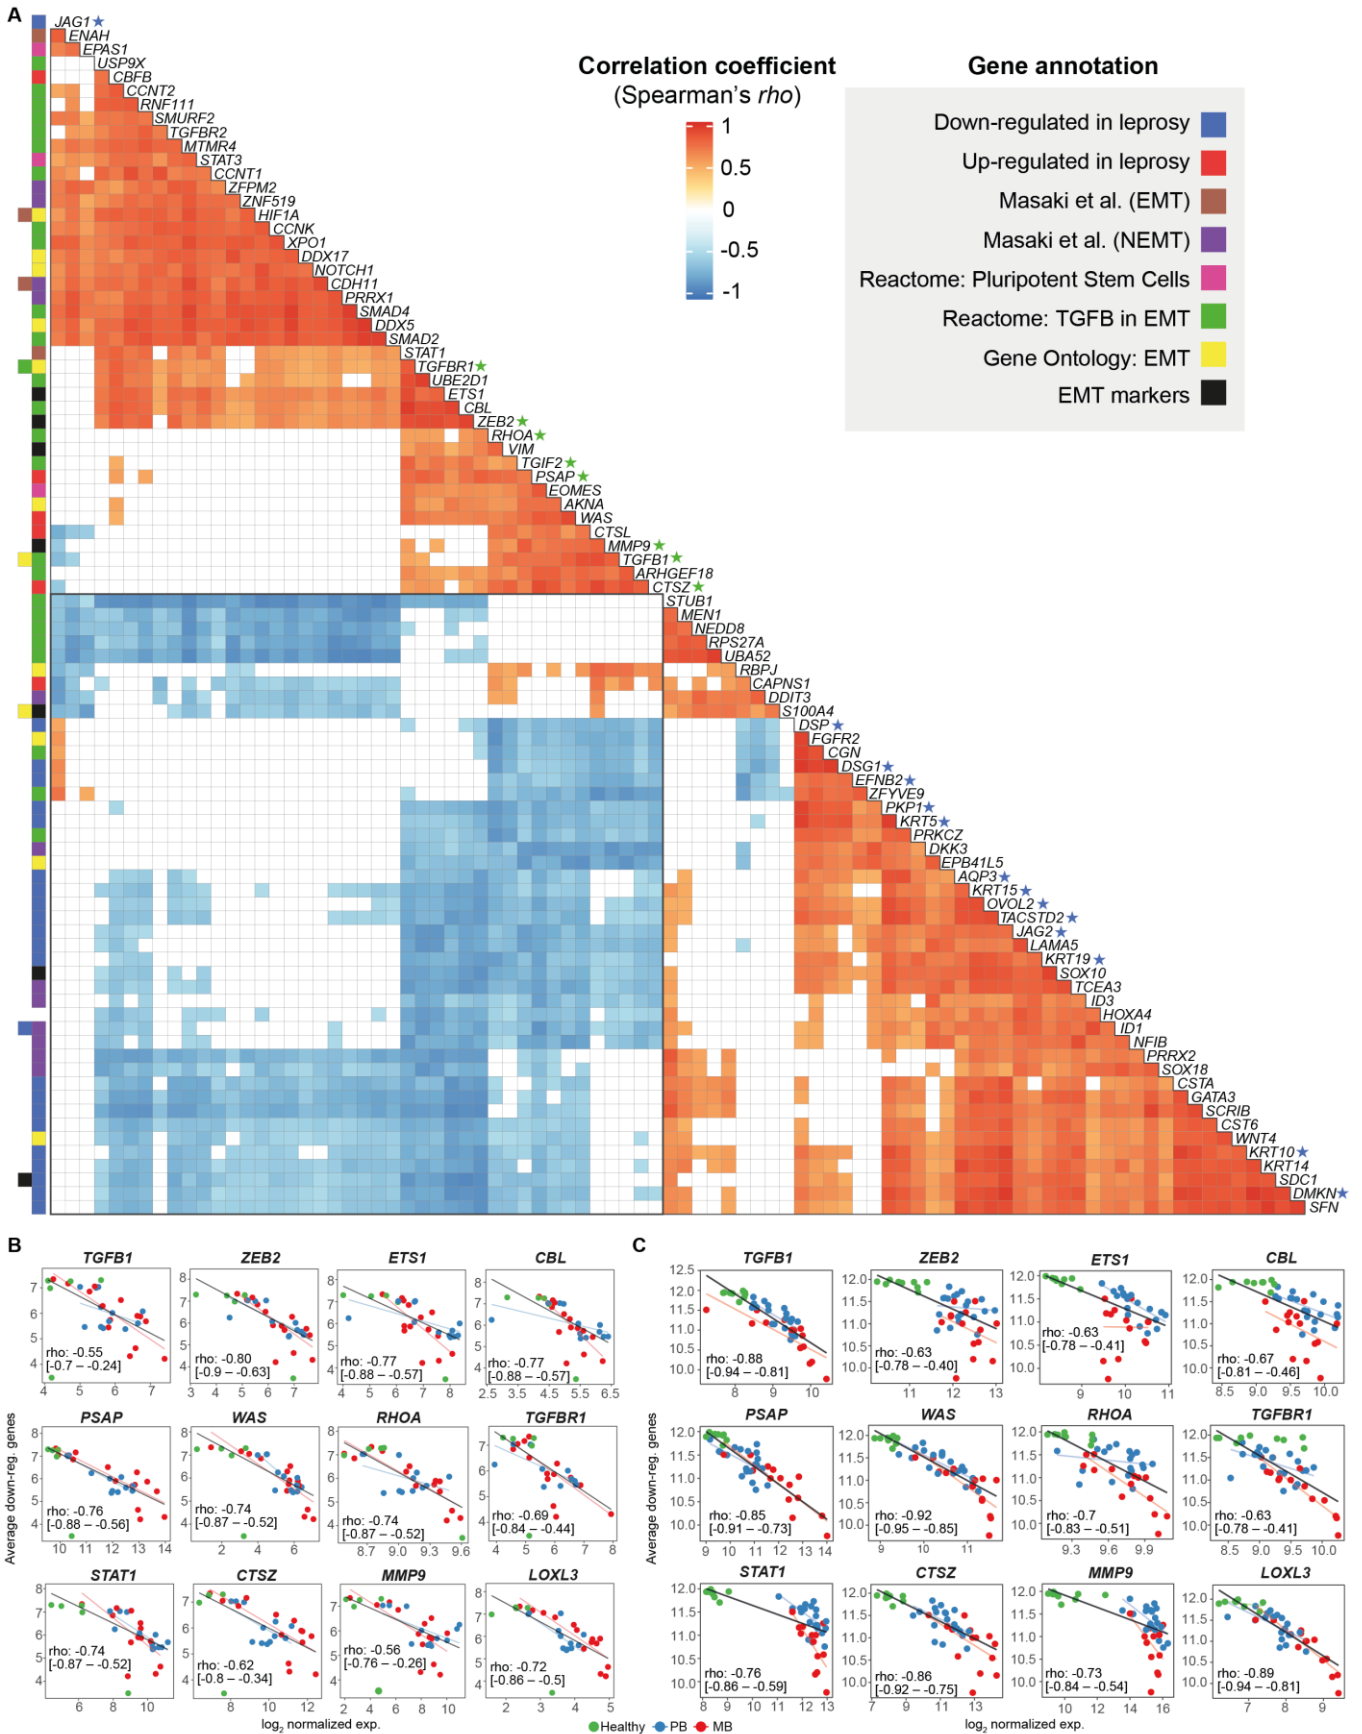

328 Fig 6. Strongest correlations between keratinocyte and EMT-related genes in

329 **leprosy lesions.** (A) Heat plot with Spearman's  $\rho$  correlation coefficient of the  
330 strongest correlations after multiple testing adjustment with at least one gene-pair  
331 passing  $FDR \leq 0.0001$  and  $\rho \leq -0.8$ . Correlations with  $FDR > 0.1$  are filled with white.  
332 Row colored squares identify gene annotations. Scatter plots of average  $\log_2$   
333 expression calculated with keratinocyte/epidermal development-related genes  
334 previously documented as down-regulated in leprosy skin against dedifferentiation-  
335 related genes using either (B) this study RNA-seq dataset or (C) Belone *et al.*  
336 microarray (GSE74481). Lines were drawn based on intercept and beta parameters  
337 estimated from robust linear regression for all samples (black line) or separately for  
338 PB (blue line), and MB (red line). Spearman's  $\rho$  coefficient along with 95% nominal  
339 confidence intervals are shown inside scatter plots calculated from all samples. See  
340 also S3 Fig and S4 Fig.

## 341 **Discussion**

342 One of the priorities in leprosy research is the development of reliable and  
343 accurate laboratory diagnosis tools for all leprosy forms to provide efficient treatment  
344 and prevent disability [41]. This goal includes diagnosing patients with early forms of  
345 the disease, those with low or mild apparent symptoms, thus assisting with ambiguous  
346 differential diagnoses, and even classifying the disease for treatment (MB vs. PB) [4].

347 Host response to infection as measured by gene expression in skin biopsies  
348 offers diagnostic, prognostic and predictive potential. By applying host transcriptomics  
349 to skin lesions from leprosy patients and other common confounding dermatoses that  
350 challenge clinicians and pathologists [9,30], we identified a small set of genes that  
351 provide a promising expression signature capable of distinguishing PB leprosy cases

352 from other confounding dermatological diseases. The top candidate, *IDO1*, is a gene  
353 involved in nutritional immunity and metabolism [42–45]. Alone, the expression of this  
354 gene was able to differentiate leprosy from non-leprosy lesions with high accuracy in  
355 our dataset and in others. According to the latest data from single-cell analysis [46],  
356 *IDO1* has been shown to be differentially expressed in Langerhans cells from leprosy  
357 lesions compared to healthy skin, corroborating our findings. However, *IDO1*  
358 expression is also increased in other mycobacterial diseases such as tuberculosis  
359 [47,48], which might decrease its specificity. The accuracy of classification could be  
360 improved by combining measurement of *IDO1* expression with that of four other  
361 biomarker genes *BLK*, *CXCL11*, *CD38*, *TLR10* and *SLAMF7*, which also showed high  
362 classification accuracy in the replication dataset. In parallel, the penalized logistic  
363 regression model, evaluated on two independent datasets, demonstrated that  
364 *HS3ST2* and *CD40LG* hold potential to differentiate between MB and PB lesions. In  
365 parallel, the penalized logistic regression model, evaluated on two independent  
366 datasets, demonstrated that *HS3ST2* and *CD40LG* hold potential to differentiate  
367 between MB and PB lesions. We recognize that there is no clinical utility in classifying  
368 MB from PB lesions with laboratory assays because this can be done during  
369 anamnesis alone. Hence, we aimed at identifying molecular features differing not only  
370 in the measure of effect ( $\log_2FC$ ) but also having little overlap between the lesion  
371 types, as this may point to previously unexplored genes and pathways relevant to  
372 future investigation. Considering the functional evidence for *HS3ST2* [49], it is possible  
373 that this gene may be involved with granuloma disassembly, tissue permeability, and  
374 cellular migration in leprosy, which would explain its overexpression in MB lesions. On  
375 the contrary, *CD40LG* (also known as CD154) is more expressed in PB patients when  
376 compared to MB with a predominant role in the activation of the microbicidal *Th1*



377 response associated with PB lesions [50]. After mechanistic validation of our findings,  
378 quantifying expression levels of *HS3ST2* and *CD40LG* from leprosy lesions could be  
379 useful to assess immune responsiveness against *M. leprae*, help patient stratification  
380 and/or provide a basis for host-based adjuvant treatment for leprosy lesions.

381         One of the challenges in translating gene expression signatures into medical  
382 diagnosis is the cost of measuring a large number of genes and transforming these  
383 values into a unique continuous or binary classifier. So far, we were able to reproduce  
384 the findings using both bulk RNA-sequencing and relative RT-qPCR, with the latter  
385 being more accessible to clinicians at least in reference centers or central hospitals.  
386 Although there are successful approved RT-qPCR relative gene expression-based  
387 diagnostic tests for diagnosing sepsis [12], clinical support for prostate [22], and breast  
388 cancer [18], there is a need for alternatives to reduce the cost and complexity of such  
389 assays. Quantification of mRNA based on isothermal amplification either with NASBA  
390 [51,52], RT-LAMP [53,54] or CRISPR-Cas12 [55] is conceivable for less specialized  
391 settings without high-end equipment. Besides, combining a multi-target expression-  
392 based diagnostic test with qPCR detection of *M. leprae* DNA could increase the  
393 specificity and sensitivity of leprosy diagnosis [56]. Alternatively, an ELISA assay  
394 measuring the levels of IDO1 protein from skin interstitial fluid, for example, could be  
395 proven useful [57]. Further studies ought to be done selecting tangible diagnostic  
396 thresholds and devising a proper classification system to allow the biomarker to  
397 function unsupervised.

398         In parallel with poor diagnosis, lack of fundamental understanding of leprosy  
399 pathogenesis has misled scientists for centuries [5,6]. Herein, we also compared the  
400 two leprosy poles, MB and PB, and identified several pathways already known to be

401 associated with leprosy, such as the humoral immune response, phagocytosis, and  
402 complement activation. Genes involved with cholesterol and fatty acids were more  
403 expressed in MB lesions, as already reported [58–60]. Interestingly, B-cell-related  
404 genes were more expressed in PB than MB. In fact, it seems that both poles modulate  
405 this pathway by a distinct set of genes. Involvement of B lymphocytes in PB leprosy  
406 pathogenesis has been described by a few groups, which may indicate differential  
407 involvement of such cells depending on the disease pole [61,62].

408 *M. leprae* subverts host cell metabolism [63] by inducing lipid biosynthesis,  
409 while avoiding type II (IFN-gamma) responses through a type I IFNs mechanism,  
410 following the phagolysosomal breach that releases DNA into the cytosol [64].  
411 However, exactly how the bacilli spread throughout the body and bypass the  
412 microbicidal immune response remains unknown. Here, we provide robust evidence  
413 indicating that *M. leprae* may induce EMT in the skin within keratinocytes and  
414 macrophages, as described in Schwann cells [38]. Indeed, *M. leprae* induced  
415 dedifferentiation of infected Schwann cells into an immature stage resembling  
416 progenitor/stem-like phenotype [38]. These reprogramming events induced by long-  
417 term infection with *M. leprae* resulted in mesenchymal cells capable of migratory and  
418 immune-permissive behavior, which in turn facilitated *M. leprae* spread to skeletal and  
419 smooth muscles and furthered macrophage recruitment [38,65]. In our previous work,  
420 we identified a down-regulated signature of keratinocyte differentiation and  
421 cornification gene markers in MB skin lesions [35]. Here, we showed that such genes  
422 are inversely correlated with genes involved with EMT, especially the members of the  
423 TGF $\beta$ -EMT pathway, such as *TGFB1*, *TGFBR1*, *TGIF2*, *PSAP*, *ZEB2* [66,67]. Some  
424 of these genes are directly or indirectly associated with EMT, such as a *PSAP* [68],

425 WAS [69], *RHOA* [70–73], *CTSZ* [74], *MMP9* [75], *LOXL3* [76], *HIF1A* [77,78] among  
426 others.

427 Our hypothesis that *M. leprae* is inducing dedifferentiation or slowing the  
428 cornification process in keratinocytes is plausible, given the evidence in Schwann cells  
429 and a few reports of infection in this cell type (Fig 7) [79,80]. Nevertheless, other  
430 phenomena could explain EMT's role in leprosy pathogenesis, such as wound healing  
431 or loss of the epithelial barrier. Although, given its obligatory intracellular lifestyle, *M.*  
432 *leprae* induces dedifferentiation in other cell types, either directly as in Schwann cells  
433 or indirectly via chemokine and cytokine production in lesions. Besides inducing  
434 keratinocyte dedifferentiation to mesenchymal cells, *M. leprae* might benefit from a  
435 decreased or alternative immune activation of these cells [81,82]. Further functional  
436 confirmatory experiments should elucidate the causality of this correlation and provide  
437 definitive evidence of the relationship between the bacilli and other cell types, such as  
438 keratinocytes, fibroblasts, and epithelial cells.

439 Our preliminary data also showed that the enriched pathways among PB skin  
440 lesions were consistent with profiles observed in other granulomatous diseases, such  
441 as noninfectious sarcoidosis and granuloma annulare, or chronic infectious diseases  
442 like tuberculosis [37,83–85]. Our findings revealed that PB (TT/BT) lesions have,  
443 among others, JAK-STAT cascade activation, which has been implicated in  
444 sarcoidosis and GA. Remarkably, the JAK-STAT specific biological inhibitor,  
445 tofacitinib, has a potent effect promoting rebalance of exacerbated immunity among  
446 sarcoidosis and granuloma annulare patients reestablishing homeostasis [83].  
447 Another compound, everolimus, has been shown in experimental models to achieve

448 the same response [37] suggesting that these drugs could be useful to treat PB, but  
449 not MB, leprosy.

450 To conclude, our combined findings provide highly discriminatory mRNA  
451 signatures from skin lesions that could distinguish leprosy from other dermatological  
452 diseases and allow disease classification by monitoring only a handful of genes. In  
453 addition, we report new genes and pathways that are likely informative regarding how  
454 *M. leprae* interacts with and subverts host cells to promote its spread within the body  
455 and subsequent transmission.

456

457



466 by specific environmental and host genetic factors. It is expected that lower (or shorter)  
467 *M. leprae* exposure, food shortage, BCG vaccination, and polymorphisms in genes  
468 controlling autophagy/granuloma formation (*NOD2*, *LRRK2*, *PRKM*) all contribute to  
469 developing leprosy per se. Excessive inflammation is one phenotype observed, that is  
470 also seen in other granulomatous diseases (e.g., cutaneous sarcoidosis, granuloma  
471 annulare), especially in paucibacillary lesions. On the other pole, epithelial-  
472 mesenchymal transition and local immunosuppression are present due to a probably  
473 higher (and/or longer) *M. leprae* exposure, combined with host single-nucleotide  
474 polymorphisms (SNPs) at key genes, like lipid biogenesis (*APOE*) and central  
475 metabolism (*HIF1A*, *LACC1/FAMIN*), culminating in disease progression.

## 476 **Materials and Methods**

### 477 **Patient cohort**

478 All patients were enrolled after informed written consent was obtained with  
479 approval from the Ethics Committee of the Oswaldo Cruz Foundation, number 151/01.  
480 Leprosy clinical forms were classified according to the criteria of Ridley and Jopling  
481 [2]. Leprosy patients were treated according to the operational criteria established by  
482 the World Health Organization [4]. Leprosy and patients with other dermatological  
483 diseases were eligible if their diagnosis was confirmed by clinical and histopathological  
484 findings. Additionally, detection of *M. leprae* DNA by qPCR routinely performed in our  
485 laboratory could be employed to support diagnosis [56,86]. HIV and hepatitis B  
486 positive patients were not included in this study, in addition, we excluded individuals  
487 with a current or previous history of tuberculosis. No other comorbidities were used to

488 exclude patients and further individual information is available in S1 Table. Skin biopsy  
489 specimens containing both epidermis and dermis were obtained with 3 mm (diameter)  
490 sterile punches following local anesthesia from the lesion site. Skin biopsies were  
491 immediately stored in one milliliter of RNALater (Ambion, Thermo Fisher Scientific Inc.,  
492 MA, USA) according to the manufacturer's instructions and stored in liquid nitrogen  
493 until RNA isolation. Healthy skin biopsies were from lesion-free sites of patients  
494 diagnosed with indeterminate or pure neural leprosy.

## 495 **Study Design**

496 The main objective of this research was to identify host gene expression  
497 patterns capable of distinguishing leprosy (including the PB forms) from other  
498 differential diagnosis of skin lesions. Our working hypothesis was that leprosy lesions,  
499 despite their morphological and histopathological similarity to other skin diseases, may  
500 induce distinct patterns of gene expression in at a small subset. We predefined the  
501 comparison of leprosy (PB+MB) from non-leprosy including GA in addition to healthy  
502 patients for RNA sequencing experiment. In addition, we predetermined comparisons  
503 between leprosy poles: MB vs. PB. Our samples are representative of a population of  
504 individuals attending the Sousa Araujo Outpatient Clinic based in Rio de Janeiro,  
505 Brazil, which also receives patients from surrounding municipalities.

## 506 **RNA isolation**

507 Snap frozen skin biopsies were thawed in wet ice and processed using TRIzol  
508 Reagent (Ambion, Thermo Fisher Scientific Inc., MA, USA) according to the  
509 manufacturer's instructions with the help of Polytron Homogenizer PT3100

510 (Kinematica AG, Switzerland). RNA was treated with DNase using the DNFree kit  
511 (Thermo Fisher Scientific Inc., MA, USA) according to the standard manufacturer's  
512 protocol, prior to use for library preparation and RT-qPCR. RNA integrity was  
513 assessed in 1% agarose gel electrophoresis or TapeStation RNA ScreenTape (Agilent  
514 Technology, CA, USA). During RNA isolation, samples were randomly assigned to  
515 extraction batches and freeze-thaw cycles to minimize batch effects and the  
516 introduction of technical artifacts. All procedures applied to samples were carried out  
517 using reagents from the same lot. The first author conducted the experiments aware  
518 of each sample group during the entire process, therefore, no blinding scheme was  
519 used, although we do not rely on perceptual/abstract measurements or analyses nor  
520 did we purposefully exclude samples.

## 521 **Library preparation and Illumina RNA sequencing**

522 RNA-seq libraries were prepared with 1 µg of total RNA for each sample using  
523 the Illumina TruSeq mRNA kit (Illumina, USA) as recommended by the manufacturer  
524 using the Illumina CD RNA indexes (Illumina, USA). Libraries were quantified and  
525 qualified using a qPCR quantification protocol guide (KAPA Library Quantification Kits  
526 for Illumina Sequencing platforms) and TapeStation D1000 ScreenTape (Agilent  
527 Technologies, USA), respectively. The resulting libraries (fragment size 200-350bp)  
528 were multiplexed (17, 17, and 19 libraries, respectively) and sequenced using the  
529 NextSeq 500 platform (Illumina, USA), generating approximately 520 million single-  
530 end reads of 75 nucleotides in length.



## 531 RNA-sequencing analysis

532 RAW bcl files were converted into .fastq using Illumina's bcl2fastq script. Then,  
533 read quality was assessed using FastQC version 0.11.8 [87]. Next, transcript counts  
534 were estimated using Salmon (v.1.13.0) quasi-mapping (human transcriptome  
535 GRCh38\_cdna sourced from Ensembl/RefGenie plus pre-computed salmon index,  
536 [http://refgenomes.databio.org/#hg38\\_cdna](http://refgenomes.databio.org/#hg38_cdna)) with default settings and --seqBias flag  
537 set [88]. Transcript counts were summarized into ENSEMBL gene counts using the R  
538 v.3.6.1 package tximport v.1.12.0 [89,90] and biomaRt v.2.40.5 [91]. The expression  
539 of sex-chromosome-specific genes, such as *UTY* and *XIST*, was used to rule out  
540 sample mislabeling. Differential expression was estimated using DESeq2 v.1.24.0,  
541 after filtering out weakly expressed genes with less than 10 counts per million and less  
542 than 15 total counts in 70% of samples [92–94]. In addition to the patient's biological  
543 sex, extraction batch and sequencing run, three surrogate variables estimated with  
544 RUVseq v.1.18.0 were included in DESeq2's generalized linear model [95,96].  
545 Nominal P-values were inspected with histograms and adjusted for multiple testing  
546 according to the method [97] proposed for controlling the false discovery rate (FDR).  
547 All log<sub>2</sub> fold-changes were shrunk prior to DE filtering with the apegglm [94] or normal  
548 algorithms. For visualization, counts per million (CPM) were computed with edgeR's  
549 cpm function v.3.26.1 and variance stabilized with the parametric method [92]. Then,  
550 surrogate variables and covariates were regressed out from the expression matrix  
551 using limma's removeBatchEffect [98–100] before being visualized with ggplot2  
552 v.3.3.0 [101]. Hierarchical clustering, heatmaps, and ROC analysis were all performed  
553 with the previously processed expression matrix. Heatmap with hierarchical clustering  
554 was drawn with ComplexHeatmap v.2.0.0 [102] or pheatmap v.1.0.12 [103] using

555 gene-wise scaled and centered matrix with Euclidean distance and average  
556 agglomeration method. Overrepresentation analysis (ORA) was used to test for Gene  
557 Ontology Biological Process (GO BP) enrichment with clusterProfiler v.3.12.0 [104]  
558 and org.Hs.eg.db v.3.8.2 annotations [105]. Up and down-regulated lists were used as  
559 inputs and the background list was composed of all genes subjected to differential  
560 expression. P-values were adjusted for multiple testing using the Benjamini-Hochberg  
561 method [97]. Raw and normalized RNA sequencing data are available in EMBL-EBI's  
562 ENA and ArrayExpress under accessions ERP128243 and E-MTAB-10318,  
563 respectively.

## 564 **RT-qPCR**

565 A total of 2.5 µg of RNA was reversed transcribed into cDNA using 4 µL of Vilo  
566 Master Mix (Thermo Fisher Scientific Inc., USA) according to the manufacturer's  
567 instructions. Then, cDNA was diluted to a final concentration of 5 ng/µL using TE buffer  
568 (10 mM Tris-HCL and 0.1 mM EDTA in RNase-free water). RT-qPCR was performed  
569 using Fast Sybr Master Mix (Thermo Fisher Scientific Inc., USA) in a final reaction  
570 volume of 10 µL. For each reaction, performed in duplicate, 5 µL of Fast Sybr Green  
571 were combined with 200 nM of each primer, 10 ng of cDNA, and q.s.p of injection-  
572 grade water. Thermal cycling and data acquisition were performed on Vii7 with 384  
573 well block (Applied Biosystems, Thermo Fisher Scientific Inc., USA) following the  
574 master mix manufacturer cycling preset with a final melting curve analysis (65 °C to  
575 95 °C, captured at every 0.5 °C). All primers were designed with NCBI Primer-Blast  
576 [106–109] to either flank intron(s) or span exon-exon junction(s) to avoid gDNA  
577 amplification (S11 Table). Further, primers were quality checked for specificity, dimers

578 and hairpin with MFEPimer v.3.0 [110,111] and IDT's oligoAnalyzer  
579 (<https://www.idtdna.com/calc/analyser>). Data were exported from QuantStudio  
580 software v.1.3 in RDML format, which was imported to LinRegPCR v.2020.0 for RT-  
581 qPCR efficiency determination and calculation of the  $N_0$  value [112,113]. Finally,  $N_0$   
582 values were imported to R and normalized using as the denominator the normalization  
583 factor (NF) calculated from the geometric mean of at least three reference genes  
584 (*RPS16*, *RPL35* and *QRICH1*), which were previously tested for stability [114]. These  
585  $N_0$  normalized values were used for visualization in Fig 2A. For mean difference  
586 estimation between groups, RT-qPCR data were analyzed in a Bayesian framework  
587 (Markov Chain Monte Carlo sampling, MCMC) using generalized linear mixed effect  
588 models under lognormal-Poisson error with MCMC.qpcr v.1.2.4 [115,116]. Per-gene  
589 efficiency estimates from LinRegPCR were used in conjunction with  $C_p$  (crossing  
590 point) calculated in QuantStudio software v.1.3 to generate the counts table. Then, the  
591 generalized linear mixed-effect model was fitted using three reference genes (allowing  
592 up to 20% between-group variation) with 550,000 iterations, thin = 100, and burn-in of  
593 50,000. The model specification included the sample (factor with 51 levels) as a  
594 random effect and the diagnosis group (factor with 3 levels) as a fixed effect. MCMC  
595 diagnostics were done by inspecting chain mixing plots and linear mixed model  
596 diagnostic plots. Ninety-five percent credible intervals were drawn around the posterior  
597 means and MCMC equivalent P-values were also computed.

## 598 **Reanalysis of public gene expression datasets**

599 Belone and collaborators GSE74481 [24] and de Toledo-Pinto and cols.  
600 GSE35423 [64] microarray datasets were reanalyzed as described elsewhere [35].  
601 Blischak and cols. [32] RNA-seq dataset (GSE67427) was reanalyzed from counts per

602 sample file from the author's Bitbucket repository (<https://bitbucket.org/jdblischak/tb->  
603 [data/src/master/](https://bitbucket.org/jdblischak/tb-data/src/master/)). Briefly, a normalized log<sub>2</sub> expression matrix was regressed out for  
604 RNA integrity number and extraction batch variables. Then, differences in gene  
605 expression (48h post-infection) for specific genes and treatments were tested using a  
606 gene-wise linear mixed model with a random intercept per sample (replicate) followed  
607 by Dunnet comparison against a "mock" group using emmeans v.1.5.3. Montoya and  
608 collaborators' dataset was retrieved from GEO (GSE125943) already normalized  
609 (DESeq2 median ratio method) and transformed with base 2 logarithm with no further  
610 processing [28].

## 611 **Correlation analyses**

612 For RNA-seq datasets, normalized log<sub>2</sub> counts-per-million values were used  
613 and log<sub>2</sub> normalized intensities for microarray. Spearman's rank correlation method  
614 was chosen because it is robust against outliers, does not rely on normality  
615 assumption, and also identifies monotonic but non-linear relationships. Initially, a list  
616 of keratinocyte/cornification/epidermal development genes that were DE in the meta-  
617 analysis was assembled [35]. Then, lists of target genes were compiled from results  
618 of Masaki *et al.* [38]: EMT and non-EMT; from Reactome: R-HSA-452723  
619 (Transcriptional regulation of pluripotent stem cells), R-HAS-5619507.3 (Activation of  
620 HOX genes during differentiation), R-HAS-2173791 (TGFβ receptor signaling in EMT);  
621 Gene Ontology GO:0001837 (EMT), and literature for EMT canonical markers. Next  
622 pairwise Spearman correlation was calculated using the Hmisc's rcorr function v.4.2-  
623 0 for every pair of genes from keratinocyte/epidermal development and EMT gene  
624 lists. P-values were adjusted for multiple testing using the BH method for FDR control

625 for all tests [97]. Additionally, 95% nominal confidence intervals were calculated using  
626 the Fieller method implemented by correlation R package v.0.5.0 [117,118]. To  
627 visualize the results, only genes with at least one pairwise correlation with Spearman's  
628 rho coefficient  $\leq -0.8$  and FDR  $\leq 0.0001$  were selected. Additionally, the average  $\log_2$   
629 expression from genes involved with keratinocyte/epidermal development was  
630 calculated and used in scatter plots against the expression of the EMT genes. Scatter  
631 plots were drawn with ggplot2 v.3.3.3 showing lines from coefficients estimated using  
632 default robust regression (MASS::rlm v.7.3-51.4) either for all samples or stratified by  
633 group. No outliers were omitted.

## 634 **Regularized (LASSO) logistic regression classification**

635 Normalized  $\log_2$  expression matrices regressed out for covariates and batches  
636 were used as input predictors. The model was trained using the microarray dataset  
637 from Belone et al. [24] with penalized regression (L1-norm, LASSO) and 4-fold cross-  
638 validation (k-fold CV) with the negative binomial log-likelihood link function, glmnet  
639 v.4.1 [119–121]. Predictors were standardized to have mean zero and unit variance  
640 inside the cv.glmnet function. We opted for L1-norm because it results in a smaller  
641 number of genes ( $\#features \leq n$ ) with non-zero coefficients, as compared to elastic-  
642 net or ridge regression counterparts. In addition, this model is suitable for high-  
643 dimensional data as it combines feature selection during model tuning and training,  
644 mitigating the effects of predictors' collinearity and reducing overfitting. To assess the  
645 coefficients' error, misclassification error rate, feature stability and model size we used  
646 non-parametric bootstrap (boot v.1.3.25) with 10,000 samples, with 4-fold cross-  
647 validation inside each loop [122,123]. The final LASSO model selected by 4-fold cross-

648 validation contained three non-zero genes. Finally, independent RNA-seq test  
649 datasets were used to compute the accuracy of the final model. Alternatively, the  
650 whole process was repeated with leave-one-out cross-validation instead of k-fold. The  
651 results were practically indistinguishable, especially regarding the feature stability  
652 (data not shown).

## 653 **Sample sizes**

654 The sample size for RNA sequencing was selected based on previous leprosy  
655 work with microarrays, aiming at detecting genes with at least a differential fold-change  
656 of two. For RT-qPCR validation, sample size calculation was performed using the per-  
657 gene standardized effect size estimated from the RNA-seq data, aiming at a power of  
658 85% and  $\alpha = 0.03$ . No samples were discarded after successful data collection  
659 (i.e. outliers). In the end, the sample sizes per group for RT-qPCR were: MB = 14,  
660 PB=11, ODD = 23. All RT-qPCR reactions were conducted in duplicate for each  
661 biological unit (here, a fragment of a skin biopsy derived from an individual).

## 662 **RT-qPCR and ROC statistical analyses**

663 Normalized RT-qPCR gene expression data were  $\log_2$  transformed before use  
664 in data visualization. Additionally, we checked if the Bayesian results remained  
665 consistent using a more common procedure (data not shown). For this, the mean  
666 normalized expression (from  $N_0$ ) was compared pairwise for the prior stipulated groups  
667 using Welch's t-test implemented in R language, using the predetermined alpha of  
668 0.03. Normality assumption was verified with normal quantile-quantile plots (qqplots,

669 car v. 3.0-2). In cases where quantile-quantile plots showed huge deviation from  
670 theoretical normal distribution, the Wilcoxon Rank Sum was used to verify results.

671 Receiver Operating Curve (ROC) analysis was used to determine the accuracy  
672 (measured by the area under the curve, AUC) and its respective best classification  
673 threshold, aiming at maximizing AUC with equal importance for sensitivity and  
674 specificity. Confidence intervals (95%) for AUC were calculated using the Delong non-  
675 parametric method as implemented in pROC v.1.15.3 [124–126].

## 676 **Data and code reporting**

677 Raw .fastq data are available in EMBL-EBI European Nucleotide Archive (ENA)  
678 database (ERP128243). Raw Salmon counts and normalized batch cleaned  
679 expression matrices are available in EMBL-EBI ArrayExpress, under E-MTAB-10318,  
680 along with experimental and phenotypic metadata. R source code and accompanying  
681 intermediate data used in all analyses in this manuscript are also readily available  
682 through Zenodo, [doi.org/10.5281/zenodo.4682010](https://doi.org/10.5281/zenodo.4682010).

## 683 **Acknowledgements**

684 The authors wish to acknowledge Suelen Justo Moreira (MSc) and Rhana Prata  
685 (PhD) for assistance with skin biopsy RNA isolation. Helen Ferreira (MSc), Cristiane  
686 Domingues and José Augusto for their technical and logistic support. The Gene  
687 Expression Core Facility (GECF) at EPFL, Lausanne, Switzerland, especially Drs.  
688 Elisa Cora and Bastien Mangeat for sequencing assistance. All patients and staff  
689 (physicians, nurses and technicians) from Sousa Araujo Outpatient clinic at FIOCRUZ,  
690 Rio de Janeiro, Brazil.

## 691 **References**

- 692 1. Britton WJ, Lockwood DN. Leprosy. *The Lancet*. 2004;363: 1209–1219.  
693 doi:10.1016/S0140-6736(04)15952-7
- 694 2. Ridley DS, Jopling WH. Classification of leprosy according to immunity. A five-  
695 group system. *Int J Lepr Mycobact Dis Off Organ Int Lepr Assoc*. 1966;34: 255–73.
- 696 3. Scollard DM, Adams LB, Gillis TP, Krahenbuhl JL, Truman W, Williams DL.  
697 The Continuing Challenges of Leprosy The Continuing Challenges of Leprosy. *Clin*  
698 *Microbiol Rev*. 2006;19: 338–381. doi:10.1128/CMR.19.2.338
- 699 4. WHO. Guidelines for the Diagnosis, Treatment and Prevention of Leprosy.  
700 Geneva: World Health Organization; 2018 p. 106.
- 701 5. WHO. Global leprosy (Hansen disease) update, 2019: time to step-up  
702 prevention initiatives. *Wkly Epidemiol Rec*. 2020;95: 417–440.
- 703 6. Nath I, Saini C, Valluri VL. Immunology of leprosy and diagnostic challenges.  
704 *Clin Dermatol*. 2015;33: 90–98. doi:10.1016/j.clindermatol.2014.07.005
- 705 7. van Hooij A, Tjon Kon Fat EM, Batista da Silva M, Carvalho Bouth R, Cunha  
706 Messias AC, Gobbo AR, et al. Evaluation of Immunodiagnostic Tests for Leprosy in  
707 Brazil, China and Ethiopia. *Sci Rep*. 2018;8: 1–9. doi:10.1038/s41598-018-36323-1
- 708 8. van Hooij A, van den Eeden S, Richardus R, Tjon Kon Fat E, Wilson L,  
709 Franken KL, et al. Application of new host biomarker profiles in quantitative point-  
710 of-care tests facilitates leprosy diagnosis in the field. *EBioMedicine*. 2019;47: 301–  
711 308. doi:10.1016/j.ebiom.2019.08.009



- 712 9. Manta FS de N, Leal-Calvo T, Moreira SJM, Marques BLC, Ribeiro-Alves M,  
713 Rosa PS, et al. Ultra-sensitive detection of *Mycobacterium leprae*: DNA extraction  
714 and PCR assays. Poonawala H, editor. PLoS Negl Trop Dis. 2020;14: e0008325.  
715 doi:10.1371/journal.pntd.0008325
- 716 10. Gliddon HD, Herberg JA, Levin M, Kaforou M. Genome-wide host RNA  
717 signatures of infectious diseases: discovery and clinical translation. Immunology.  
718 2018;153: 171–178. doi:10.1111/imm.12841
- 719 11. Ko ER, Yang WE, McClain MT, Woods CW, Ginsburg GS, Tsalik EL. What  
720 was old is new again: Using the host response to diagnose infectious disease.  
721 Expert Rev Mol Diagn. 2015;15: 1143–1158. doi:10.1586/14737159.2015.1059278
- 722 12. Miller RR, Lopansri BK, Burke JP, Levy M, Opal S, Rothman RE, et al.  
723 Validation of a host response assay, SeptiCyte LAB, for discriminating sepsis from  
724 systemic inflammatory response syndrome in the ICU. Am J Respir Crit Care Med.  
725 2018;198: 903–913. doi:10.1164/rccm.201712-2472OC
- 726 13. Van Hooij A, Fat EMTK, Van Den Eeden SJF, Wilson L, Da Silva MB,  
727 Salgado CG, et al. Field-friendly serological tests for determination of *M. leprae*-  
728 specific antibodies. Sci Rep. 2017;7: 1–8. doi:10.1038/s41598-017-07803-7
- 729 14. Warsinske H, Vashisht R, Khatri P. Host-response-based gene signatures for  
730 tuberculosis diagnosis: A systematic comparison of 16 signatures. PLoS Med.  
731 2019;16. doi:10.1371/journal.pmed.1002786
- 732 15. Röltgen K, Pluschke G, Spencer JS, Brennan PJ, Avanzi C. The immunology  
733 of other mycobacteria: *M. ulcerans*, *M. leprae*. Semin Immunopathol. 2020;42: 333–  
734 353. doi:10.1007/s00281-020-00790-4

- 735 16. Mesko B, Poliska S, Nagy L. Gene expression profiles in peripheral blood for  
736 the diagnosis of autoimmune diseases. *Trends Mol Med.* 2011;17: 223–233.  
737 doi:10.1016/j.molmed.2010.12.004
- 738 17. Wang B, Chen S, Zheng Q, Gao Z, Chen R, Xuan J, et al. Development and  
739 initial validation of diagnostic gene signatures for systemic lupus erythematosus. *Ann*  
740 *Rheum Dis.* 2019. doi:10.1136/annrheumdis-2019-216695
- 741 18. Carlson JJ, Roth JA. The impact of the Oncotype Dx breast cancer assay in  
742 clinical practice: A systematic review and meta-analysis. *Breast Cancer Res Treat.*  
743 2013;141: 13–22. doi:10.1007/s10549-013-2666-z
- 744 19. Gordon GJ, Jensen RV, Hsiao LL, Gullans SR, Blumenstock JE, Ramaswamy  
745 S, et al. Translation of microarray data into clinically relevant cancer diagnostic tests  
746 using gene expression ratios in lung cancer and mesothelioma. *Cancer Res.*  
747 2002;62: 4963–4967.
- 748 20. Narrandes S, Xu W. Gene expression detection assay for cancer clinical use.  
749 *J Cancer.* 2018;9: 2249–2265. doi:10.7150/jca.24744
- 750 21. Clark-Langone KM, Sangli C, Krishnakumar J, Watson D. Translating tumor  
751 biology into personalized treatment planning: analytical performance characteristics  
752 of the Oncotype DX®Colon Cancer Assay. *BMC Cancer.* 2010;10: 691.  
753 doi:10.1186/1471-2407-10-691
- 754 22. Knezevic D, Goddard AD, Natraj N, Cherbavaz DB, Clark-Langone KM,  
755 Snable J, et al. Analytical validation of the Oncotype DX prostate cancer assay - a  
756 clinical RT-PCR assay optimized for prostate needle biopsies. *BMC Genomics.*  
757 2013;14: 1–12. doi:10.1186/1471-2164-14-690

- 758 23. Laible M, Schlombs K, Kaiser K, Veltrup E, Herlein S, Lakis S, et al. Technical  
759 validation of an RT-qPCR in vitro diagnostic test system for the determination of  
760 breast cancer molecular subtypes by quantification of ERBB2 , ESR1 , PGR and  
761 MKI67 mRNA levels from formalin- fixed paraffin-embedded breast tumor  
762 specimens. BMC Cancer. 2016; 1–14. doi:10.1186/s12885-016-2476-x
- 763 24. Belone A de FF, Rosa PS, Trombone APF, Fachin LRV, Guidella CC, Ura S,  
764 et al. Genome-wide screening of mRNA expression in leprosy patients. Front Genet.  
765 2015;6: 1–12. doi:10.3389/fgene.2015.00334
- 766 25. Jorge KTOS, Souza RP, Assis MTA, Araújo MG, Locati M, Jesus AMR, et al.  
767 Characterization of MicroRNA Expression Profiles and Identification of Potential  
768 Biomarkers in Leprosy. J Clin Microbiol. 2017;55: 1516–1525.  
769 doi:10.1128/JCM.02408-16
- 770 26. Tió-Coma M, van Hooij A, Bobosha K, van der Ploeg-van Schip JJ, Banu S,  
771 Khadge S, et al. Whole blood RNA signatures in leprosy patients identify reversal  
772 reactions before clinical onset: a prospective, multicenter study. Sci Rep. 2019;9:  
773 17931. doi:10.1038/s41598-019-54213-y
- 774 27. Tió-Coma M, Kiełbasa SM, van den Eeden SJF, Mei H, Roy JC, Wallinga J, et  
775 al. Blood RNA signature RISK4LEP predicts leprosy years before clinical onset.  
776 EBioMedicine. 2021;68: 103379. doi:10.1016/j.ebiom.2021.103379
- 777 28. Montoya DJ, Andrade P, Silva BJA, Teles RMB, Ma F, Bryson B, et al. Dual  
778 RNA-Seq of Human Leprosy Lesions Identifies Bacterial Determinants Linked to  
779 Host Immune Response. Cell Rep. 2019;26: 3574-3585.e3.  
780 doi:10.1016/j.celrep.2019.02.109

- 781 29. Bhatia S, Shenoi SD, Pai K, Srilatha PS. Granuloma multiforme: an  
782 uncommon differential for leprosy. *Trop Doct.* 2019;49: 55–58.  
783 doi:10.1177/0049475518803191
- 784 30. Kundakci N, Erdem C. Leprosy: A great imitator. *Clin Dermatol.* 2019;37:  
785 200–212. doi:10.1016/j.clindermatol.2019.01.002
- 786 31. Zhu TH, Kamangar F, Silverstein M, Fung MA. Borderline Tuberculoid  
787 Leprosy Masquerading as Granuloma Annulare: A Clinical and Histological Pitfall.  
788 *Am J Dermatopathol.* 2017;39: 296–299. doi:10.1097/DAD.0000000000000698
- 789 32. Blischak JD, Tailleux L, Mitrano A, Barreiro LB, Gilad Y. Mycobacterial  
790 infection induces a specific human innate immune response. *Sci Rep.* 2015;5: 1–16.  
791 doi:10.1038/srep16882
- 792 33. Modlin RL. Th1-Th2 paradigm: insights from leprosy. *J Invest Dermatol.*  
793 1994;102: 828–832. doi:10.1111/1523-1747.ep12381958
- 794 34. Yamamura M, Uyemura K, Deans RJ, Weinberg K, Rea TH, Bloom BR, et al.  
795 Defining protective responses to pathogens: Cytokine profiles in leprosy lesions.  
796 *Science.* 1991;254: 277–279. doi:10.1126/science.1925582
- 797 35. Leal-Calvo T, Moraes MO. Reanalysis and integration of public microarray  
798 datasets reveals novel host genes modulated in leprosy. *Mol Genet Genomics.*  
799 2020;295: 1355–1368. doi:10.1007/s00438-020-01705-6
- 800 36. Judson MA, Marchell RM, Mascelli M, Piantone A, Barnathan ES, Petty KJ, et  
801 al. Molecular profiling and gene expression analysis in cutaneous sarcoidosis: the  
802 role of interleukin-12, interleukin-23, and the T-helper 17 pathway. *J Am Acad*  
803 *Dermatol.* 2012;66: 901–910, 910.e1–2. doi:10.1016/j.jaad.2011.06.017

- 804 37. Linke M, Pham HTT, Katholnig K, Schnöller T, Miller A, Demel F, et al.  
805 Chronic signaling via the metabolic checkpoint kinase mTORC1 induces  
806 macrophage granuloma formation and marks sarcoidosis progression. *Nat Immunol.*  
807 2017;18: 293–302. doi:10.1038/ni.3655
- 808 38. Masaki T, Qu J, Cholewa-Waclaw J, Burr K, Raaum R, Rambukkana A.  
809 Reprogramming adult Schwann cells to stem cell-like cells by leprosy bacilli  
810 promotes dissemination of infection. *Cell.* 2013;152: 51–67.  
811 doi:10.1016/j.cell.2012.12.014
- 812 39. Brabletz T, Kalluri R, Nieto MA, Weinberg RA. EMT in cancer. *Nat Rev*  
813 *Cancer.* 2018;18: 128–134. doi:10.1038/nrc.2017.118
- 814 40. Pastushenko I, Blanpain C. EMT Transition States during Tumor Progression  
815 and Metastasis. *Trends Cell Biol.* 2019;29: 212–226. doi:10.1016/j.tcb.2018.12.001
- 816 41. Khazai Z, Van Brakel W, Essink D, Gillis T, Kasang C, Kuipers P, et al.  
817 Reviewing Research Priorities of the Leprosy Research Initiative (LRI): a  
818 stakeholder’s consultation. *Lepr Rev.* 2019;90: 3–30. doi:10.47276/lr.90.1.3
- 819 42. Chen W. IDO: more than an enzyme. *Nat Immunol.* 2011;12: 809–811.  
820 doi:10.1038/ni.2088
- 821 43. Greco FA, Coletti A, Camaioni E, Carotti A, Marinozzi M, Gioiello A, et al. The  
822 Janus-faced nature of IDO1 in infectious diseases: challenges and therapeutic  
823 opportunities. *Future Med Chem.* 2016;8: 39–54. doi:10.4155/fmc.15.165
- 824 44. Melé M, Ferreira PG, Reverter F, DeLuca DS, Monlong J, Sammeth M, et al.  
825 The human transcriptome across tissues and individuals. *Science.* 2015;348: 660–  
826 665. doi:10.1126/science.aaa0355

- 827 45. Yamazaki F, Kuroiwa T, Takikawa O, Kido R. Human indolylamine 2,3-  
828 dioxygenase. Its tissue distribution, and characterization of the placental enzyme.  
829 *Biochem J.* 1985;230: 635–638. doi:10.1042/bj2300635
- 830 46. Hughes TK, Wadsworth MH, Gierahn TM, Do T, Weiss D, Andrade PR, et al.  
831 Second-Strand Synthesis-Based Massively Parallel scRNA-Seq Reveals Cellular  
832 States and Molecular Features of Human Inflammatory Skin Pathologies. *Immunity.*  
833 2020;53: 878-894.e7. doi:10.1016/j.immuni.2020.09.015
- 834 47. Gautam US, Foreman TW, Bucsan AN, Veatch AV, Alvarez X, Adekambi T, et  
835 al. In vivo inhibition of tryptophan catabolism reorganizes the tuberculoma and  
836 augments immune-mediated control of *Mycobacterium tuberculosis*. *Proc Natl Acad*  
837 *Sci U S A.* 2018;115: E62–E71. doi:10.1073/pnas.1711373114
- 838 48. Yeung AWS, Terentis AC, King NJC, Thomas SR. Role of indoleamine 2,3-  
839 dioxygenase in health and disease. *Clin Sci.* 2015;129: 601–672.  
840 doi:10.1042/CS20140392
- 841 49. Denys A, Allain F. The emerging roles of heparan sulfate 3-O-  
842 sulfotransferases in cancer. *Front Oncol.* 2019;9. doi:10.3389/fonc.2019.00507
- 843 50. Yamauchi PS, Bleharski JR, Uyemura K, Kim J, Sieling PA, Miller A, et al. A  
844 Role for CD40-CD40 Ligand Interactions in the Generation of Type 1 Cytokine  
845 Responses in Human Leprosy. *J Immunol.* 2000;165: 1506–1512.  
846 doi:10.4049/jimmunol.165.3.1506
- 847 51. Heim A. Highly sensitive detection of gene expression of an intronless gene:  
848 amplification of mRNA, but not genomic DNA by nucleic acid sequence based

- 849 amplification (NASBA). *Nucleic Acids Res.* 1998;26: 2250–2251.  
850 doi:10.1093/nar/26.9.2250
- 851 52. Patterson SS, Casper ET, Garcia-Rubio L, Smith MC, Paul JH. Increased  
852 precision of microbial RNA quantification using NASBA with an internal control. *J*  
853 *Microbiol Methods.* 2005;60: 343–352. doi:10.1016/j.mimet.2004.10.011
- 854 53. Ganguli A, Ornob A, Spegazzini N, Liu Y, Damhorst G, Ghonge T, et al.  
855 Pixelated spatial gene expression analysis from tissue. *Nat Commun.* 2018;9.  
856 doi:10.1038/s41467-017-02623-9
- 857 54. Pandey M, Singh D, Onteru SK. Reverse transcription loop-mediated  
858 isothermal amplification (RT-LAMP), a light for mammalian transcript analysis in low-  
859 input laboratories. *J Cell Biochem.* 2018;119: 4334–4338. doi:10.1002/jcb.26624
- 860 55. Broughton JP, Deng X, Yu G, Fasching CL, Servellita V, Singh J, et al.  
861 CRISPR–Cas12-based detection of SARS-CoV-2. *Nat Biotechnol.* 2020;38: 870–  
862 874. doi:10.1038/s41587-020-0513-4
- 863 56. Barbieri RR, Manta FSN, Moreira SJM, Sales AM, Nery JAC, Nascimento  
864 LPR, et al. Quantitative polymerase chain reaction in paucibacillary leprosy  
865 diagnosis: A follow-up study. *PLoS Negl Trop Dis.* 2019;13: e0007147.  
866 doi:10.1371/journal.pntd.0007147
- 867 57. Strassner JP, Rashighi M, Ahmed Refat M, Richmond JM, Harris JE. Suction  
868 blistering the lesional skin of vitiligo patients reveals useful biomarkers of disease  
869 activity. *J Am Acad Dermatol.* 2017;76: 847-855.e5. doi:10.1016/j.jaad.2016.12.021
- 870 58. Elamin AA, Stehr M, Singh M. Lipid Droplets and *Mycobacterium leprae*  
871 Infection. *J Pathog.* 2012;10. doi:10.1155/2012/361374

- 872 59. Lobato LS, Rosa PS, Ferreira J da S, Neumann A da S, da Silva MG, do  
873 Nascimento DC, et al. Statins increase rifampin mycobactericidal effect. *Antimicrob*  
874 *Agents Chemother.* 2014;58: 5766–74. doi:10.1128/AAC.01826-13
- 875 60. Wang D, Zhang D-F, Li G-D, Bi R, Fan Y, Wu Y, et al. A pleiotropic effect of  
876 the APOE gene: association of APOE polymorphisms with multibacillary leprosy in  
877 Han Chinese from Southwest China. *Br J Dermatol.* 2018;178: 931–939.  
878 doi:10.1111/bjd.16020
- 879 61. Fabel A, Giovanna Brunasso AM, Schettini AP, Cota C, Puntoni M, Nunzi E,  
880 et al. Pathogenesis of Leprosy. *Am J Dermatopathol.* 2019;41: 422–427.  
881 doi:10.1097/DAD.0000000000001310
- 882 62. Iyer AM, Mohanty KK, van Egmond D, Katoch K, Faber WR, Das PK, et al.  
883 Leprosy-specific B-cells within cellular infiltrates in active leprosy lesions. *Hum*  
884 *Pathol.* 2007;38: 1065–1073. doi:10.1016/j.humpath.2006.12.017
- 885 63. Medeiros RCA, Girardi K do C de V, Cardoso FKL, Mietto B de S, Pinto TG  
886 de T, Gomez LS, et al. Subversion of Schwann Cell Glucose Metabolism by  
887 *Mycobacterium leprae*. *J Biol Chem.* 2016;291: 21375–21387.  
888 doi:10.1074/jbc.M116.725283
- 889 64. de Toledo-Pinto TG, Ferreira ABR, Ribeiro-Alves M, Rodrigues LS, Batista-  
890 Silva LR, Silva BJ de A, et al. STING-Dependent 2'-5' Oligoadenylate Synthetase-  
891 Like Production Is Required for Intracellular *Mycobacterium leprae* Survival. *J Infect*  
892 *Dis.* 2016;214: 311–320. doi:10.1093/infdis/jiw144



- 893 65. Hess S, Rambukkana A. Bacterial-induced cell reprogramming to stem cell-  
894 like cells: new premise in host–pathogen interactions. *Curr Opin Microbiol.* 2015;23:  
895 179–188. doi:10.1016/j.mib.2014.11.021
- 896 66. Vandewalle C, Comijn J, De Craene B, Vermassen P, Bruyneel E, Andersen  
897 H, et al. SIP1/ZEB2 induces EMT by repressing genes of different epithelial cell-cell  
898 junctions. *Nucleic Acids Res.* 2005;33: 6566–6578. doi:10.1093/nar/gki965
- 899 67. DaSilva-Arnold SC, Kuo CY, Davra V, Remache Y, Kim PCW, Fisher JP, et  
900 al. ZEB2, a master regulator of the epithelial-mesenchymal transition, mediates  
901 trophoblast differentiation. *Mol Hum Reprod.* 2018;25: 61–75.  
902 doi:10.1093/molehr/gay053
- 903 68. Jiang Y, Zhou J, Hou D, Luo P, Gao H, Ma Y, et al. Prosaposin is a biomarker  
904 of mesenchymal glioblastoma and regulates mesenchymal transition through the  
905 TGF- $\beta$ 1/Smad signaling pathway. *J Pathol.* 2019;249: 26–38. doi:10.1002/path.5278
- 906 69. Frugtniet BA, Martin TA, Zhang L, Jiang WG. Neural Wiskott-Aldrich  
907 syndrome protein (nWASP) is implicated in human lung cancer invasion. *BMC*  
908 *Cancer.* 2017;17. doi:10.1186/s12885-017-3219-3
- 909 70. Bendris N, Arsic N, Lemmers B, Blanchard JM. Cyclin A2, Rho GTPases and  
910 EMT. *Small GTPases.* 2012;3: 225–228. doi:10.4161/sgtp.20791
- 911 71. Bhowmick NA, Ghiassi M, Bakin A, Aakre M, Lundquist CA, Engel ME, et al.  
912 Transforming growth factor- $\beta$ 1 mediates epithelial to mesenchymal  
913 transdifferentiation through a RhoA-dependent mechanism. *Mol Biol Cell.* 2001;12:  
914 27–36. doi:10.1091/mbc.12.1.27

- 915 72. Salvi A, Thanabalu T. WIP promotes in-vitro invasion ability, anchorage  
916 independent growth and EMT progression of A549 lung adenocarcinoma cells by  
917 regulating RhoA levels. *Biochem Biophys Res Commun.* 2017;482: 1353–1359.  
918 doi:10.1016/j.bbrc.2016.12.040
- 919 73. Wang Q, Yang X, Xu Y, Shen Z, Cheng H, Cheng F, et al. RhoA/Rho-kinase  
920 triggers epithelial-mesenchymal transition in mesothelial cells and contributes to the  
921 pathogenesis of dialysis-related peritoneal fibrosis. *Oncotarget.* 2018;9: 14397–  
922 14412. doi:10.18632/oncotarget.24208
- 923 74. Wang J, Chen L, Li Y, Guan XY. Overexpression of cathepsin Z contributes to  
924 tumor metastasis by inducing epithelial-mesenchymal transition in hepatocellular  
925 carcinoma. *PLoS ONE.* 2011;6. doi:10.1371/journal.pone.0024967
- 926 75. Lin CY, Tsai PH, Kandaswami CC, Lee PP, Huang CJ, Hwang JJ, et al.  
927 Matrix metalloproteinase-9 cooperates with transcription factor Snail to induce  
928 epithelial-mesenchymal transition. *Cancer Sci.* 2011;102: 815–827.  
929 doi:10.1111/j.1349-7006.2011.01861.x
- 930 76. Peinado H, del Carmen Iglesias-de la Cruz M, Olmeda D, Csiszar K, Fong  
931 KSK, Vega S, et al. A molecular role for lysyl oxidase-like 2 enzyme in Snail  
932 regulation and tumor progression. *EMBO J.* 2005;24: 3446–3458.  
933 doi:10.1038/sj.emboj.7600781
- 934 77. Tam SY, Wu VWC, Law HKW. Hypoxia-Induced Epithelial-Mesenchymal  
935 Transition in Cancers: HIF-1 $\alpha$  and Beyond. *Front Oncol.* 2020;10.  
936 doi:10.3389/fonc.2020.00486

- 937 78. Zhu Y, Tan J, Xie H, Wang J, Meng X, Wang R. HIF-1 $\alpha$  regulates EMT via the  
938 Snail and  $\beta$ -catenin pathways in paraquat poisoning-induced early pulmonary  
939 fibrosis. *J Cell Mol Med*. 2016;20: 688–697. doi:10.1111/jcmm.12769
- 940 79. Lyrio ECD, Campos-Souza IC, Corrêa LCD, Lechuga GC, Verícimo M, Castro  
941 HC, et al. Interaction of *Mycobacterium leprae* with the HaCaT human keratinocyte  
942 cell line: new frontiers in the cellular immunology of leprosy. *Exp Dermatol*. 2015;24:  
943 536–542. doi:10.1111/exd.12714
- 944 80. Okada S, Komura J, Nishiura M. *Mycobacterium leprae* found in epidermal  
945 cells by electron microscopy. *IntJLeprOther MycobactDis*. 1978;46: 30–34.
- 946 81. Pivarcsi A, Kemény L, Dobozy A. Innate Immune Functions of the  
947 Keratinocytes. *Acta Microbiol Immunol Hung*. 2004;51: 303–310.  
948 doi:10.1556/AMicr.51.2004.3.8
- 949 82. Pivarcsi A, Nagy I, Lajos K. Innate Immunity in the Skin: How Keratinocytes  
950 Fight Against Pathogens. *Curr Immunol Rev*. 2005;1: 29–43.  
951 doi:10.2174/1573395052952941
- 952 83. Damsky W, Thakral D, McGeary MK, Leventhal J, Galan A, King B. Janus  
953 kinase inhibition induces disease remission in cutaneous sarcoidosis and granuloma  
954 annulare. *J Am Acad Dermatol*. 2020;82: 612–621. doi:10.1016/j.jaad.2019.05.098
- 955 84. Flynn JL, Chan J, Lin PL. Macrophages and control of granulomatous  
956 inflammation in tuberculosis. *Mucosal Immunol*. 2011;4: 271–278.  
957 doi:10.1038/mi.2011.14
- 958 85. Locke LW, Crouser ED, White P, Julian MW, Caceres EG, Papp AC, et al. IL-  
959 13-regulated Macrophage Polarization during Granuloma Formation in an In Vitro

- 960 Human Sarcoidosis Model. *Am J Respir Cell Mol Biol*. 2019;60: 84–95.  
961 doi:10.1165/rcmb.2018-0053OC
- 962 86. Manta FSN, Barbieri RR, Moreira SJM, Santos PTS, Nery JAC, Duppre NC,  
963 et al. Quantitative PCR for leprosy diagnosis and monitoring in household contacts:  
964 A follow-up study, 2011–2018. *Sci Rep*. 2019;9. doi:10.1038/s41598-019-52640-5
- 965 87. Brabham Bioinformatics. FastQC: A Quality Control Tool for High  
966 Throughput Sequence Data [Online]. 2015. Available:  
967 <http://www.bioinformatics.babraham.ac.uk/projects/fastqc/>
- 968 88. Patro R, Duggal G, Love MI, Irizarry RA, Kingsford C. Salmon provides fast  
969 and bias-aware quantification of transcript expression. *Nat Methods*. 2017;14: 417–  
970 419. doi:10.1038/nmeth.4197
- 971 89. R Core Team. R: A language and environment for statistical computing.  
972 Vienna, Austria; 2017. Available: <https://www.r-project.org/>
- 973 90. Sonesson C, Love MI, Robinson MD. Differential analyses for RNA-seq:  
974 transcript-level estimates improve gene-level inferences. *F1000Research*. 2016;4:  
975 1521. doi:10.12688/f1000research.7563.2
- 976 91. Durinck S, Moreau Y, Kasprzyk A, Davis S, De Moor B, Brazma A, et al.  
977 BioMart and Bioconductor: a powerful link between biological databases and  
978 microarray data analysis. *Bioinformatics*. 2005;21: 3439–3440.  
979 doi:10.1093/bioinformatics/bti525
- 980 92. Anders S, Huber W. Differential expression analysis for sequence count data.  
981 *Genome Biol*. 2010;11: R106. doi:10.1186/gb-2010-11-10-r106

- 982 93. Love MI, Huber W, Anders S. Moderated estimation of fold change and  
983 dispersion for RNA-seq data with DESeq2. *Genome Biol.* 2014;15: 550.  
984 doi:10.1186/s13059-014-0550-8
- 985 94. Zhu A, Ibrahim JG, Love MI. Heavy-Tailed prior distributions for sequence  
986 count data: Removing the noise and preserving large differences. *Bioinformatics.*  
987 2019;35: 2084–2092. doi:10.1093/bioinformatics/bty895
- 988 95. Gagnon-Bartsch JA, Speed TP. Using control genes to correct for unwanted  
989 variation in microarray data. *Biostatistics.* 2012;13: 539–552.  
990 doi:10.1093/biostatistics/kxr034
- 991 96. Risso D, Ngai J, Speed TP, Dudoit S. Normalization of RNA-seq data using  
992 factor analysis of control genes or samples. *Nat Biotechnol.* 2014;32: 896–902.  
993 doi:10.1038/nbt.2931
- 994 97. Benjamini Y, Hochberg Y. Controlling the False Discovery Rate: A Practical  
995 and Powerful Approach to Multiple Testing. *Journal of the Royal Statistical Society.*  
996 *Series B (Methodological).* WileyRoyal Statistical Society; 1995.  
997 doi:10.2307/2346101
- 998 98. Phipson B, Lee S, Majewski IJ, Alexander WS, Smyth GK. Robust  
999 hyperparameter estimation protects against hypervariable genes and improves  
1000 power to detect differential expression. *Ann Appl Stat.* 2016;10: 946–963.  
1001 doi:10.1214/16-AOAS920
- 1002 99. Ritchie ME, Phipson B, Wu D, Hu Y, Law CW, Shi W, et al. limma powers  
1003 differential expression analyses for RNA-sequencing and microarray studies. *Nucleic*  
1004 *Acids Res.* 2015;43: e47. doi:10.1093/nar/gkv007

- 1005 100. Smyth GK. Linear Models and Empirical Bayes Methods for Assessing  
1006 Differential Expression in Microarray Experiments Linear Models and Empirical  
1007 Bayes Methods for Assessing Differential Expression in Microarray Experiments.  
1008 Stat Appl Genet Mol Biol. 2004;3: 1–26. doi:10.2202/1544-6115.1027
- 1009 101. Wickham H. ggplot2-Elegant Graphics for Data Analysis. 1st ed. New York,  
1010 NY: Springer New York; 2009. doi:10.1007/978-0-387-98141-3
- 1011 102. Gu Z, Eils R, Schlesner M. Complex heatmaps reveal patterns and  
1012 correlations in multidimensional genomic data. Bioinformatics. 2016;32: 2847–2849.  
1013 doi:10.1093/bioinformatics/btw313
- 1014 103. Kolde R. pheatmap: Pretty Heatmaps. 2015. Available: [https://cran.r-](https://cran.r-project.org/package=pheatmap)  
1015 [project.org/package=pheatmap](https://cran.r-project.org/package=pheatmap)
- 1016 104. Yu G, Wang L-G, Han Y, He Q-Y. clusterProfiler: an R Package for  
1017 Comparing Biological Themes Among Gene Clusters. OMICS J Integr Biol. 2012;16:  
1018 284–287. doi:10.1089/omi.2011.0118
- 1019 105. Carlson M. org.Hs.eg.db: Genome wide annotation for Human. 2019.  
1020 Available: [10.18129/B9.bioc.org.Hs.eg.db](https://bioconductor.org/packages/B9/org.Hs.eg.db)
- 1021 106. Koressaar T, Remm M. Enhancements and modifications of primer design  
1022 program Primer3. Bioinformatics. 2007;23: 1289–1291.  
1023 doi:10.1093/bioinformatics/btm091
- 1024 107. Kõressaar T, Lepamets M, Kaplinski L, Raime K, Andreson R, Remm M.  
1025 Primer3\_masker: integrating masking of template sequence with primer design  
1026 software. Bioinformatics. 2018;34: 1937–1938. doi:10.1093/bioinformatics/bty036

- 1027 108. Untergasser A, Cutcutache I, Koressaar T, Ye J, Faircloth BC, Remm M, et al.  
1028 Primer3—new capabilities and interfaces. *Nucleic Acids Res.* 2012;40: e115–e115.  
1029 doi:10.1093/nar/gks596
- 1030 109. Ye J, Coulouris G, Zaretskaya I, Cutcutache I, Rozen S, Madden TL. Primer-  
1031 BLAST: a tool to design target-specific primers for polymerase chain reaction. *BMC*  
1032 *Bioinformatics.* 2012;13: 134. doi:10.1186/1471-2105-13-134
- 1033 110. Qu W, Shen Z, Zhao D, Yang Y, Zhang C. MFEprimer: Multiple factor  
1034 evaluation of the specificity of PCR primers. *Bioinformatics.* 2009;25: 276–278.  
1035 doi:10.1093/bioinformatics/btn614
- 1036 111. Wang K, Li H, Xu Y, Shao Q, Yi J, Wang R, et al. MFEprimer-3.0: Quality  
1037 control for PCR primers. *Nucleic Acids Res.* 2019;47: W610–W613.  
1038 doi:10.1093/nar/gkz351
- 1039 112. Ramakers C, Ruijter JM, Lekanne Deprez RH, Moorman AFM. Assumption-  
1040 free analysis of quantitative real-time polymerase chain reaction (PCR) data.  
1041 *Neurosci Lett.* 2003;339: 62–66. doi:10.1016/S0304-3940(02)01423-4
- 1042 113. Ruijter JM, Ramakers C, Hoogaars WMH, Karlen Y, Bakker O, Van den hoff  
1043 MJB, et al. Amplification efficiency: Linking baseline and bias in the analysis of  
1044 quantitative PCR data. *Nucleic Acids Res.* 2009;37. doi:10.1093/nar/gkp045
- 1045 114. Vandesompele J, De Preter K, Pattyn ilip, Poppe B, Van Roy N, De Paepe A,  
1046 et al. Accurate normalization of real-time quantitative RT-PCR data by geometric  
1047 averaging of multiple internal control genes. *Genome Biol.* 2002;3: 34–1.  
1048 doi:10.1186/gb-2002-3-7-research0034

- 1049 115. Matz MV, Wright RM, Scott JG. No control genes required: Bayesian analysis  
1050 of qRT-PCR data. *PLoS One*. 2013;8: 1–12. doi:10.1371/journal.pone.0071448
- 1051 116. Steibel JP, Poletto R, Coussens PM, Rosa GJM. A powerful and flexible linear  
1052 mixed model framework for the analysis of relative quantification RT-PCR data.  
1053 *Genomics*. 2009;94: 146–152. doi:10.1016/j.ygeno.2009.04.008
- 1054 117. Fieller EC, Hartley HO, Pearson ES. TESTS FOR RANK CORRELATION  
1055 COEFFICIENTS I. *Biometrika*. 1957;44: 470–481. doi:10.1093/biomet/44.3-4.470
- 1056 118. Makowski D, Ben-Shachar MS, Patil I, Lüdecke D. Methods and Algorithms  
1057 for Correlation Analysis in R. *J Open Source Softw*. 2020;5: 2306.  
1058 doi:10.21105/joss.02306
- 1059 119. Friedman J, Hastie T, Tibshirani R. Regularization paths for generalized linear  
1060 models via coordinate descent. *J Stat Softw*. 2010;33: 1–22.  
1061 doi:10.18637/jss.v033.i01
- 1062 120. Simon N, Friedman JH, Hastie T, Tibshirani R. Regularization Paths for Cox's  
1063 Proportional Hazards Model via Coordinate Descent. *J Stat Softw*. 2011;39: 1–13.  
1064 doi:10.18637/jss.v039.i05
- 1065 121. Tibshirani R. Regression Shrinkage and Selection via the Lasso. *J R Stat Soc*  
1066 *Ser B Methodol*. 1996;58: 267–288.
- 1067 122. Hastie T, Tibshirani R, Wainwright M. *Statistical Learning with Sparsity*. 1st  
1068 ed. Chapman and Hall/CRC; 2015.
- 1069 123. Davison AC, Hinley DV. *Bootstrap Methods and Their Application*. Cambridge  
1070 University Press; 1997. Available: <http://statwww.epfl.ch/davison/BMA/>



- 1071 124. DeLong ER, DeLong DM, Clarke-Pearson DL. Comparing the Areas under  
1072 Two or More Correlated Receiver Operating Characteristic Curves: A Nonparametric  
1073 Approach. *Biometrics*. 1988;44: 837. doi:10.2307/2531595
- 1074 125. Robin X, Turck N, Hainard A, Tiberti N, Lisacek F, Sanchez JC, et al. pROC:  
1075 An open-source package for R and S+ to analyze and compare ROC curves. *BMC*  
1076 *Bioinformatics*. 2011;12: 77. doi:10.1186/1471-2105-12-77
- 1077 126. Sun X, Xu W. Fast implementation of DeLong's algorithm for comparing the  
1078 areas under correlated receiver operating characteristic curves. *IEEE Signal Process*  
1079 *Lett.* 2014;21: 1389–1393. doi:10.1109/LSP.2014.2337313

## 1080 **Supporting Information**

### 1081 **S1 Appendix. Linking expression profiles to mycobacteria species.**

#### 1082 **S1 Fig. Gene expression in MB and PB groups from test and training datasets.**

1083 Normalized log<sub>2</sub> expression values per group from (A) this study RNA-seq dataset or  
1084 (B) Belone *et al.* (GSE74481) [24]. The genes shown were selected in 25%–50% of  
1085 the LASSO models (Fig 4B) according to the bootstrap. MB, multibacillary leprosy; PB,  
1086 paucibacillary leprosy; TT, tuberculoid leprosy; BT, borderline-tuberculoid; BB,  
1087 borderline-borderline; BL, borderline-lepromatous; LL, lepromatous. Each point  
1088 represents an independent skin biopsy from a patient. Y-axis values are not  
1089 comparable between panels A and B.

1090 **S2 Fig. Strongest correlations between the average expression of genes**  
1091 **associated with keratinocyte/cornification against dedifferentiation-related**  
1092 **genes using Montoya *et al.* RNA-seq dataset [28].** Scatter plots of scores (average

1093 normalized  $\log_2$  expression) calculated from genes with previously documented down-  
1094 regulation in leprosy skin lesions against dedifferentiation-related genes with Montoya  
1095 *et al.* RNA-seq dataset (GSE125943) [28]. Lines were drawn based on intercept and  
1096 beta estimates from robust linear regression for all samples (black) or separately for  
1097 TL (tuberculoid leprosy, blue), and LL (lepromatous leprosy, red). X-axis shows  $\log_2$   
1098 normalized expression values. Spearman's rho are shown along with nominal 95%  
1099 confidence intervals inside the plots. Most genes shown have  $FDR < 0.1$  and  $\rho \leq -$   
1100 0.6. Related to figure 6.

1101 **S3 Fig. Strongest correlations between modulated genes from**  
1102 **keratinocyte/cornification and dedifferentiation-related genes using Belone et**  
1103 **al. microarray dataset (GSE74481) [24].** Heat plot with Spearman's rho correlation  
1104 coefficient of the strongest correlations from all ontologies screened after multiple  
1105 testing adjustment (BH-FDR). Most genes shown have  $FDR \leq 0.0001$  and  $\rho \leq -0.7$ .  
1106 Bottom colored rectangles indicate which category the gene was present (some genes  
1107 co-occur). Related to figure 6.

1108 **S1 Table. Demographic and clinical metadata from human participants.**

1109 **S2 Table. Genes differentially expressed from leprosy vs. non-leprosy with**  
1110  **$|\log_2FC| \geq 1$  and  $FDR \leq 0.01$ .**

1111 **S3 Table. Over-representation analysis (ORA) for leprosy vs. non-leprosy (up-**  
1112 **regulated) differentially expressed genes.**

1113 **S4 Table. ROC analysis from RNA-seq dataset using leprosy vs. non-leprosy**  
1114 **samples.**

1115 **S5 Table. Posterior log<sub>2</sub>FC estimates, 95% credible intervals and MCMC P-**  
1116 **values from PB-OD and MB-OD comparisons.**

1117 **S6 Table. ROC analysis results using RT-qPCR with the validation dataset**  
1118 **(Related to Fig 3).** 95% confidence intervals are shown, except for AUCs of 1.0. The  
1119 table is sorted from highest to lowest AUC.

1120 **S7 Table. Log<sub>2</sub>FC estimates, confidence intervals, and Dunnet *P*-values from**  
1121 **distinct mycobacterial stimuli in human macrophages *in vitro*.**

1122 **S8 Table. Genes differentially expressed from multibacillary paucibacillary**  
1123 **leprosy with  $|\log_2\text{FC}| \geq 1$  and  $\text{FDR} \leq 0.01$ .**

1124 **S9 Table. Over-representation analysis (ORA) for MB vs. PB (up-regulated)**  
1125 **differentially expressed genes.**

1126 **S10 Table. Over-representation analysis (ORA) for MB vs. PB (down-regulated)**  
1127 **differentially expressed genes.**

1128 **S11 Table. Oligonucleotide sequences.**
